# Supplementary material for: Silver(i) complexes with 2-acetylpyridinebenzoylhydrazones exhibit antimicrobial effects against yeast and filamentous fungi
Source: Royal Society of Chemistry journal article supplement (doi:10.1039/c7nj04280a), 2018-01-01
Supplement: c7nj04280a1.pdf [file c7nj04280a1.pdf]

*Electronic Supplementary Information (ESI)*

*New Journal of Chemistry*

**Silver(I) complexes with 2-acetylpyridinebenzoylhydrazones exhibit antimicrobial effects against yeast and filamentous fungi**

Ane F. Santos,<sup>a</sup> Isabella P. Ferreira,<sup>a</sup> Jacqueline A. Takahashi,<sup>a</sup> Gabriel L. S. Rodrigues<sup>a</sup>,  
Carlos B. Pinheiro<sup>b</sup>, Leticia R. Teixeira<sup>a</sup>, Willian R. Rocha<sup>a</sup>, Heloisa Beraldo<sup>\*a</sup>

<sup>a</sup> Departamento de Química, Universidade Federal de Minas Gerais, 31270-901, Belo Horizonte, MG, Brazil

<sup>b</sup> Departamento de Física, Universidade Federal de Minas Gerais, 31270-901, Belo Horizonte, MG, Brazil

\*Corresponding author. Phone number: +55 (31) 3409-5740.

E-mail address: hberaldo@ufmg.br

heloisaberaldoufmg@gmail.com (H. Beraldo)

## Table of contents

|                                                                                                                   |    |
|-------------------------------------------------------------------------------------------------------------------|----|
| <i>The chemical structures of 2-acetylpyridine derived hydrazones and their silver(I) complexes (I-4)</i> .....   | 3  |
| <i>Infrared spectra of 2-acetylpyridine derived hydrazones and their silver(I) complexes (I-4)</i> .....          | 4  |
| <i><sup>1</sup>H, COSY, <sup>13</sup>C{<sup>1</sup>H} and HMQC NMR spectra of silver(I) complexes (I-4)</i> ..... | 8  |
| <i>Mass spectra (ESI) of silver(I) complexes (I-4)</i> .....                                                      | 24 |
| <i>X-ray crystallography</i> .....                                                                                | 28 |
| <i>Structure Activity Relationship (SAR) studies</i> .....                                                        | 32 |

The chemical structures of 2-acetylpyridine derived hydrazones and their silver(I) complexes (1-4)

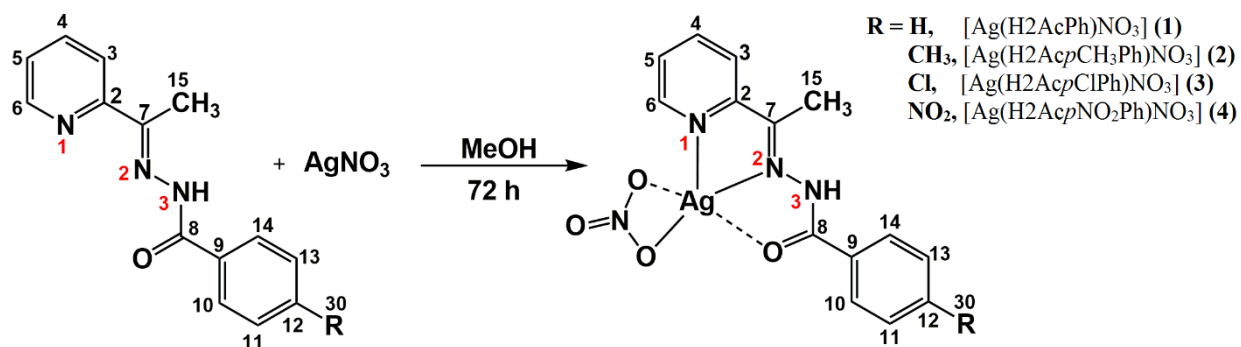

**Fig. S1** Syntheses of the silver(I) complexes with 2-acetylpyridine derived hydrazones and carbon atoms numbering.

*Infrared spectra of 2-acetylpyridine derived hydrazones and their silver(I) complexes (1-4)*

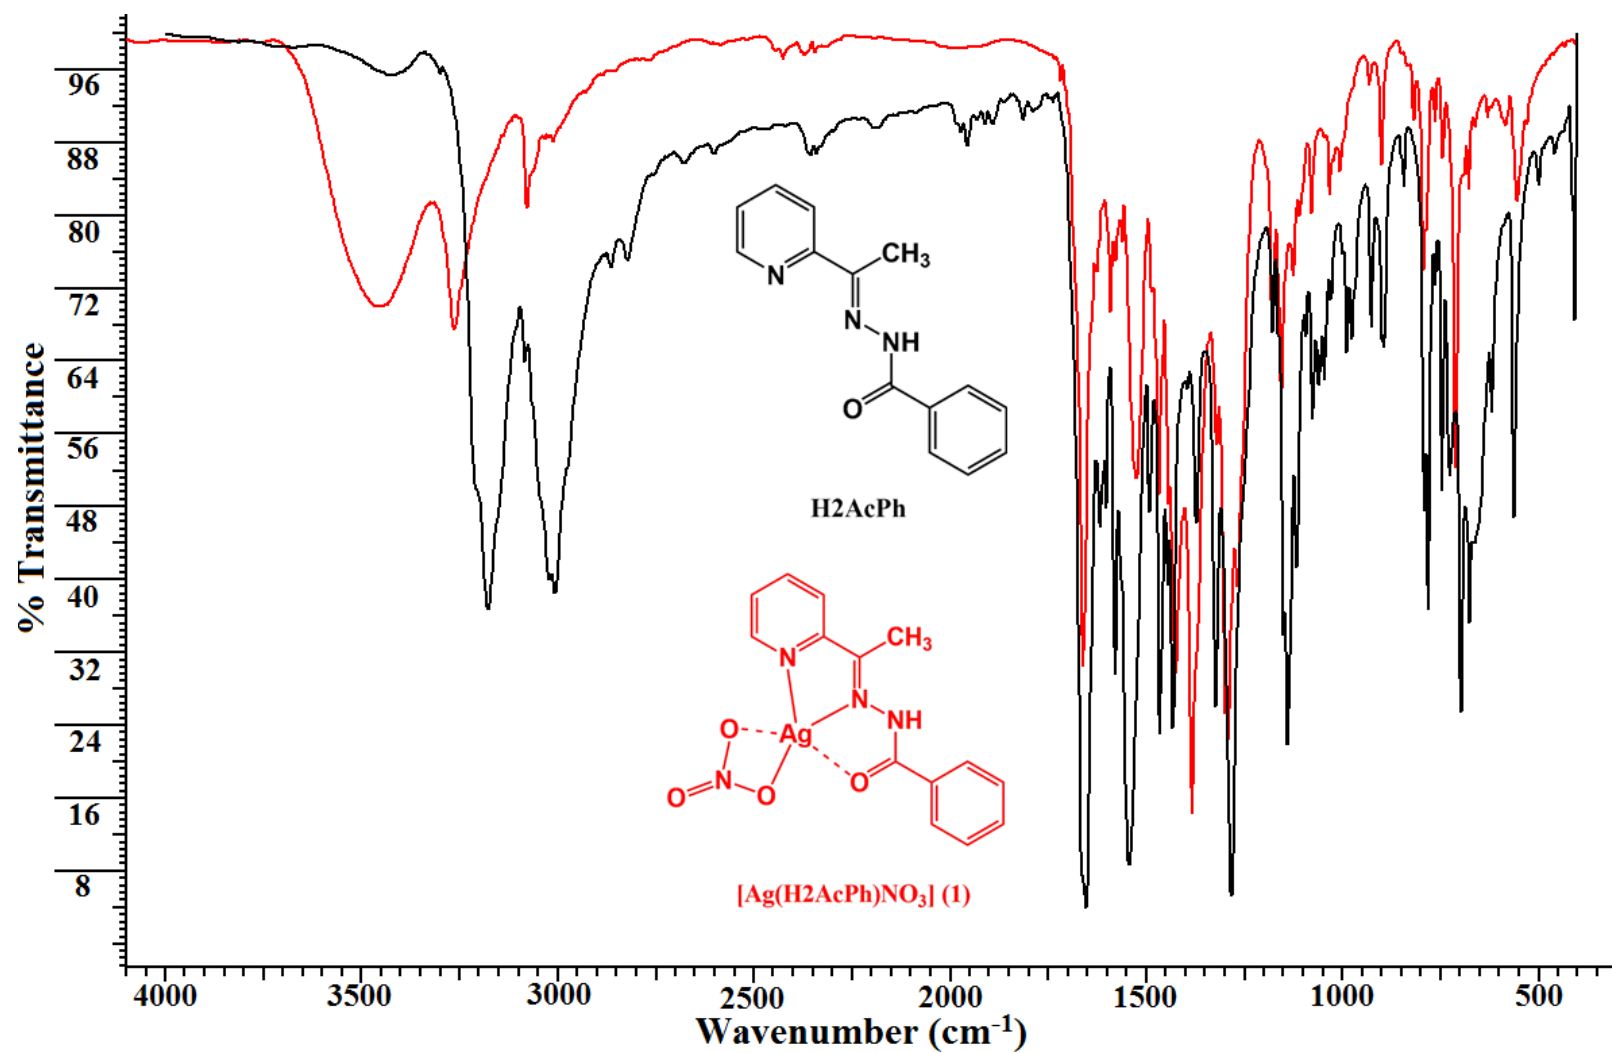

**Fig. S2** IR spectrum of H<sub>2</sub>AcPh (black) and [Ag(H<sub>2</sub>AcPh)NO<sub>3</sub>] (1) (red) obtained in KBr pellets (4000-400 cm<sup>-1</sup>).

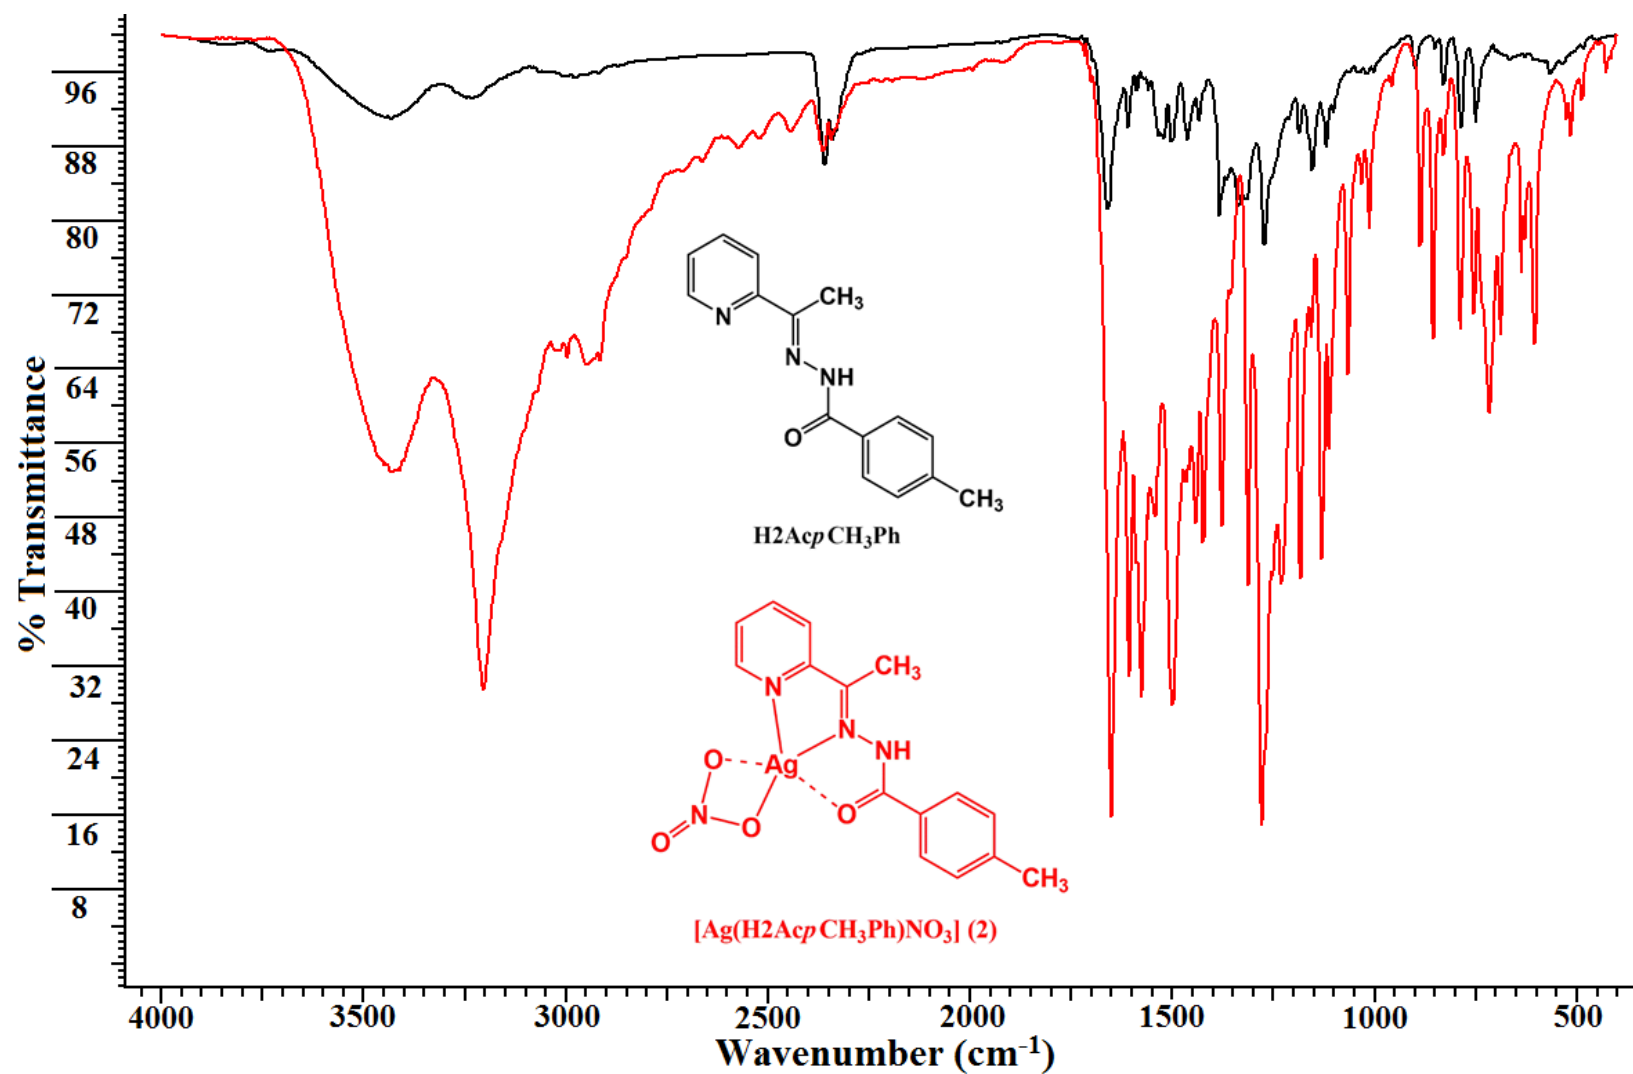

Fig. S3 IR spectrum of H<sub>2</sub>AcpCH<sub>3</sub>Ph (black) and [Ag(H<sub>2</sub>AcpCH<sub>3</sub>Ph)NO<sub>3</sub>] (2) (red) obtained in KBr pellets (4000-400 cm<sup>-1</sup>).

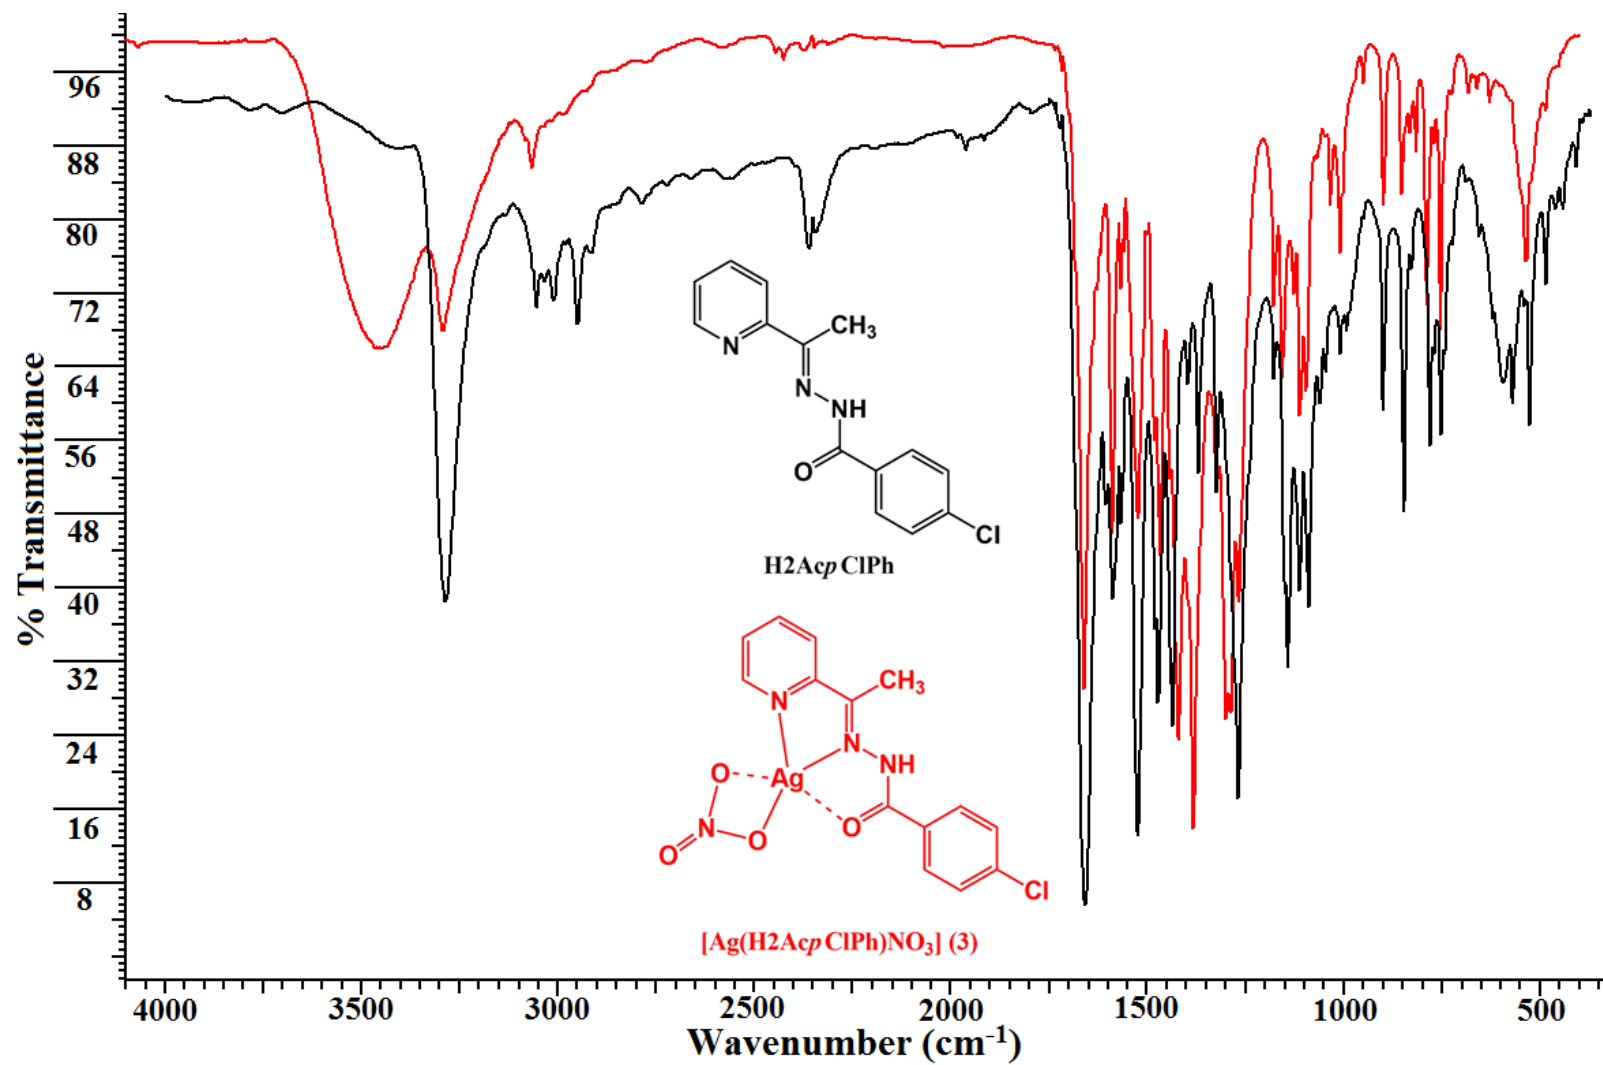

Fig. S4 IR spectrum of H<sub>2</sub>AcpClPh (black) and [Ag(H<sub>2</sub>AcpClPh)NO<sub>3</sub>] (3) (red) obtained in KBr pellets (4000-400 cm<sup>-1</sup>).

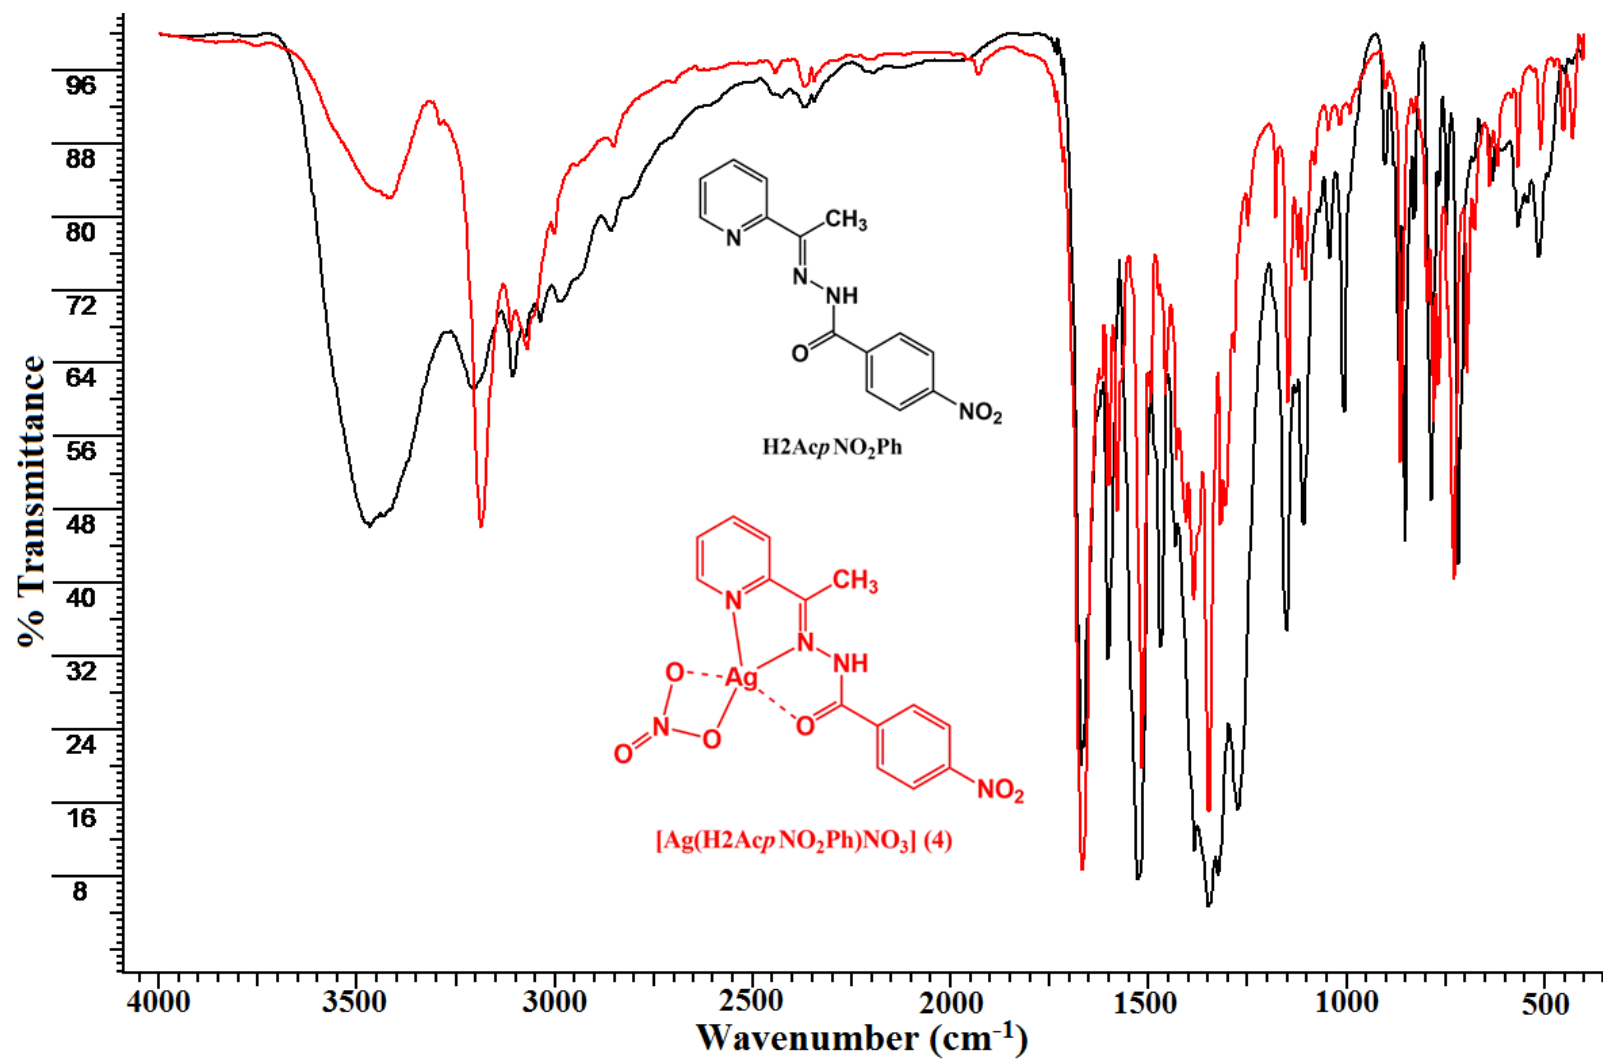

Fig. S5 IR spectrum of H<sub>2</sub>AcpNO<sub>2</sub>Ph (black) and [Ag(H<sub>2</sub>AcpNO<sub>2</sub>Ph)NO<sub>3</sub>] (4) (red) obtained in KBr pellets (4000-400 cm<sup>-1</sup>).

$^1\text{H}$ , COSY,  $^{13}\text{C}\{^1\text{H}\}$  and HMQC NMR spectra of silver(I) complexes (1-4)

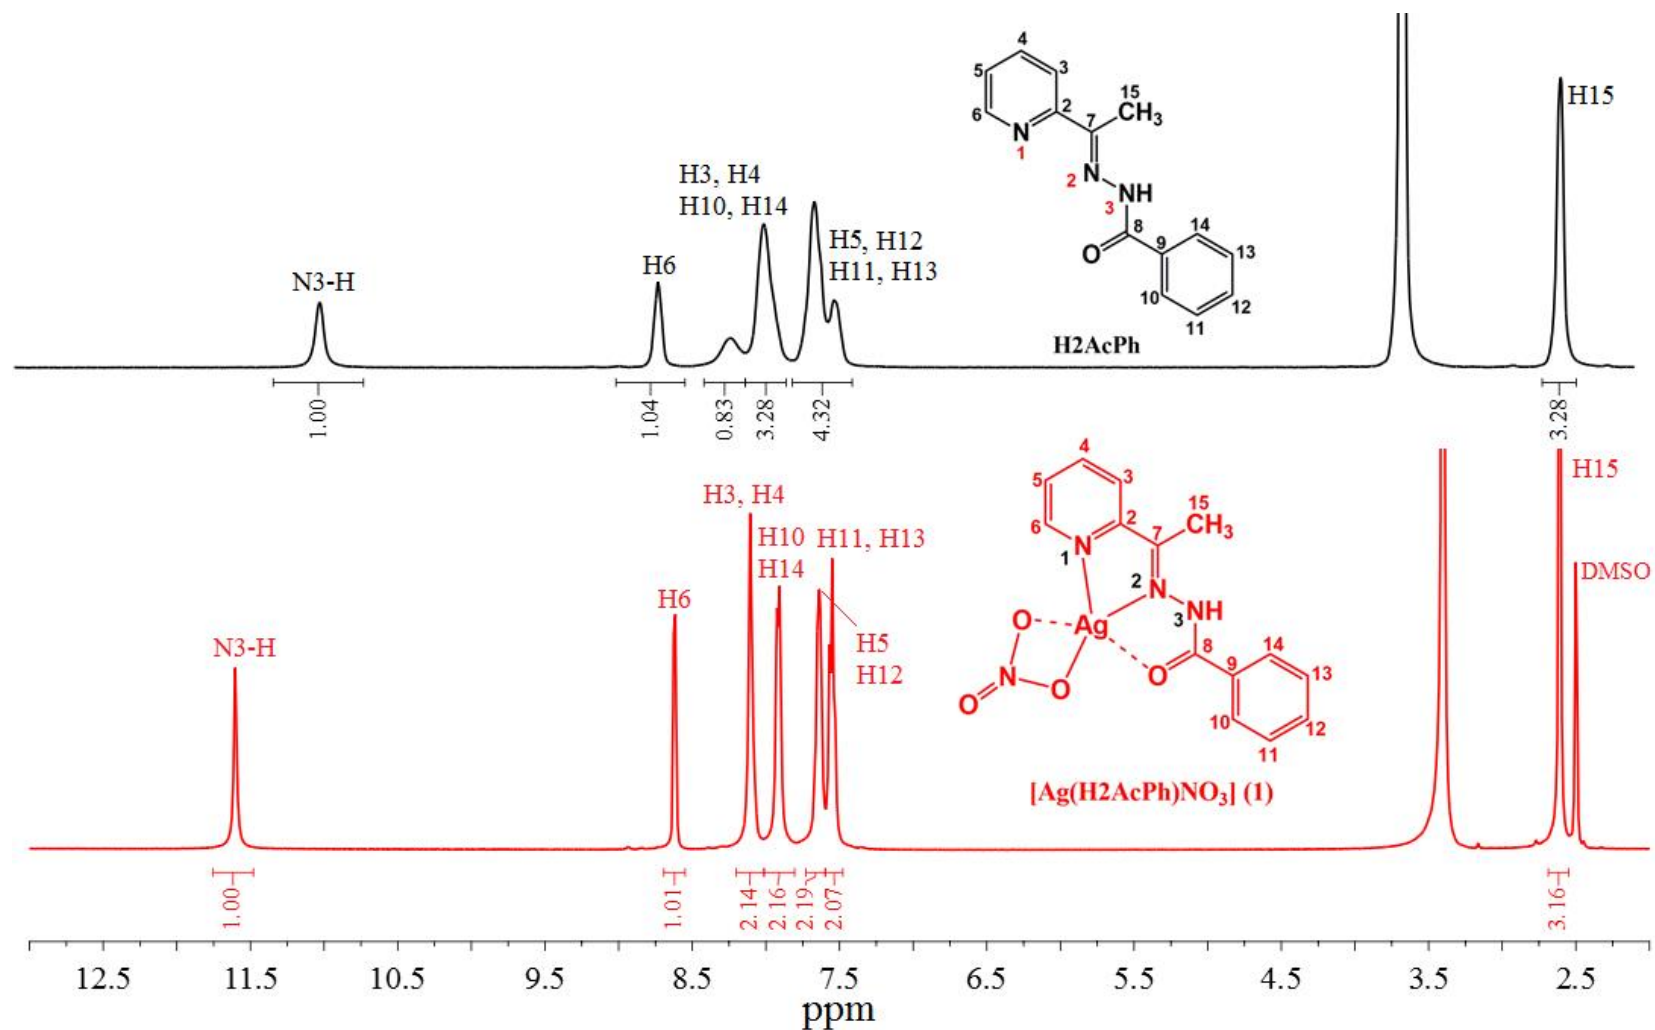

**Fig. S6**  $^1\text{H}$  NMR spectrum of H2AcPh (black) and [Ag(H2AcPh)NO<sub>3</sub>] (1) (red) registered in DMSO-*d*<sub>6</sub> at 25°C.



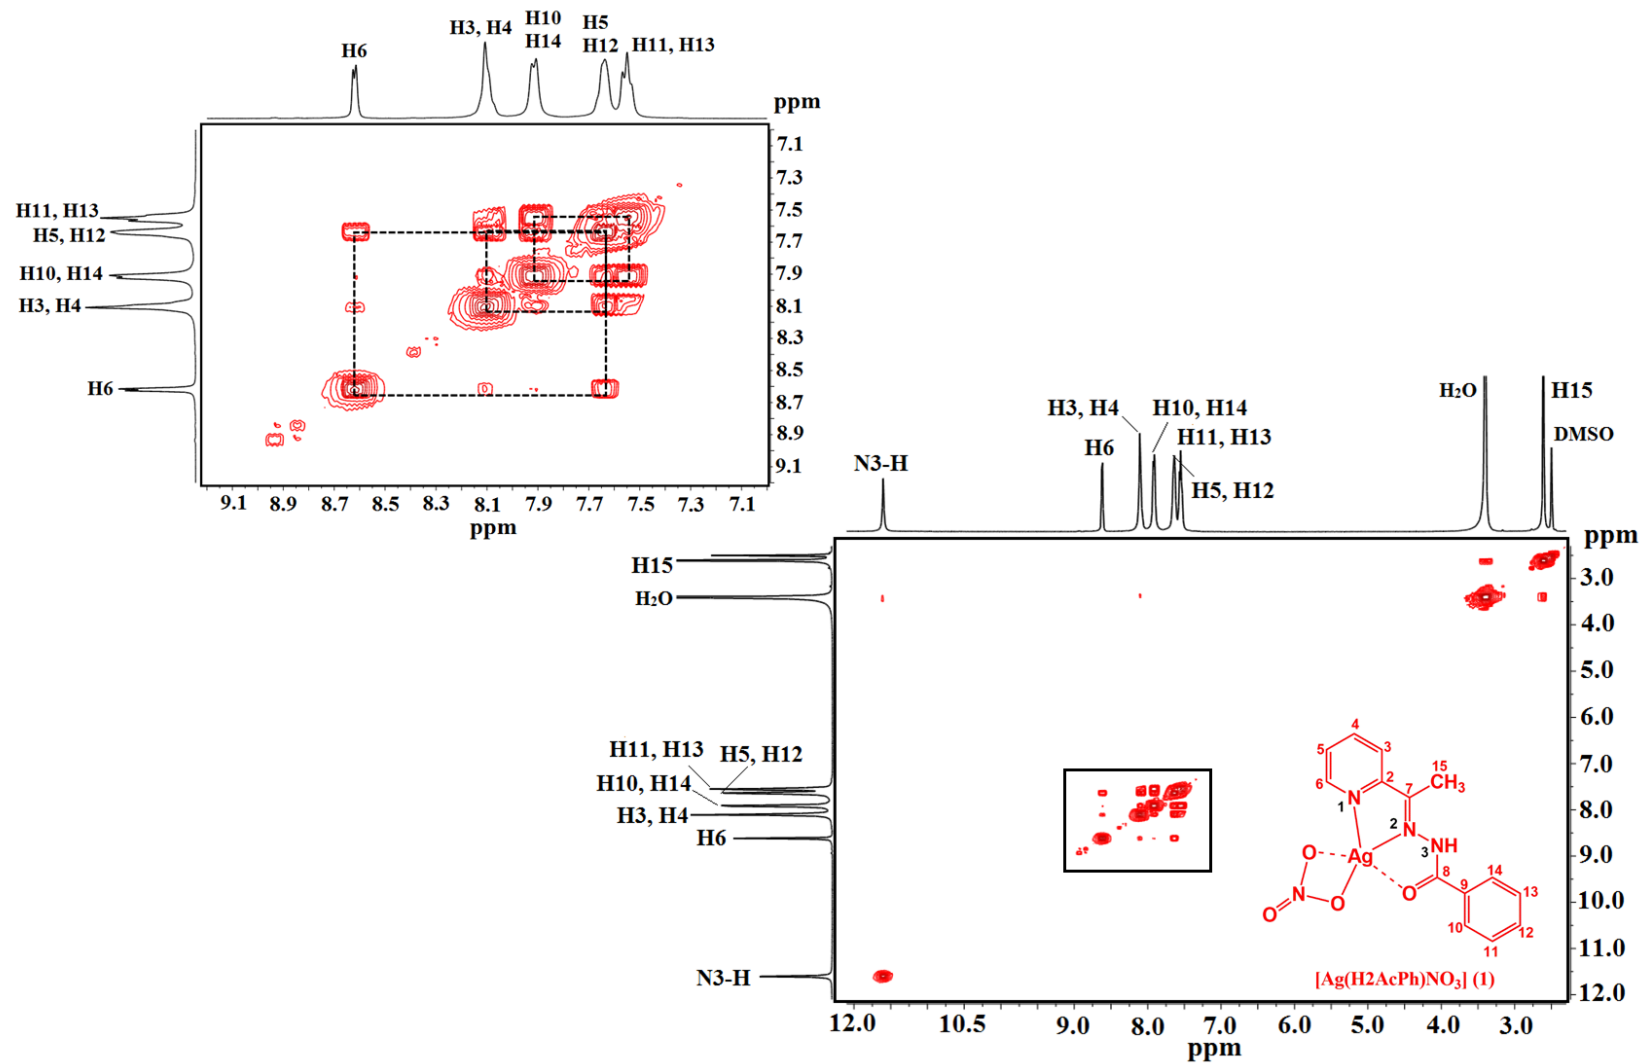

**Fig. S7** COSY ( $^1\text{H}$ - $^1\text{H}$ ) contour map of  $[\text{Ag}(\text{H}_2\text{AcPh})\text{NO}_3]$  (1) registered in  $\text{DMSO-}d_6$  at  $25^\circ\text{C}$ .

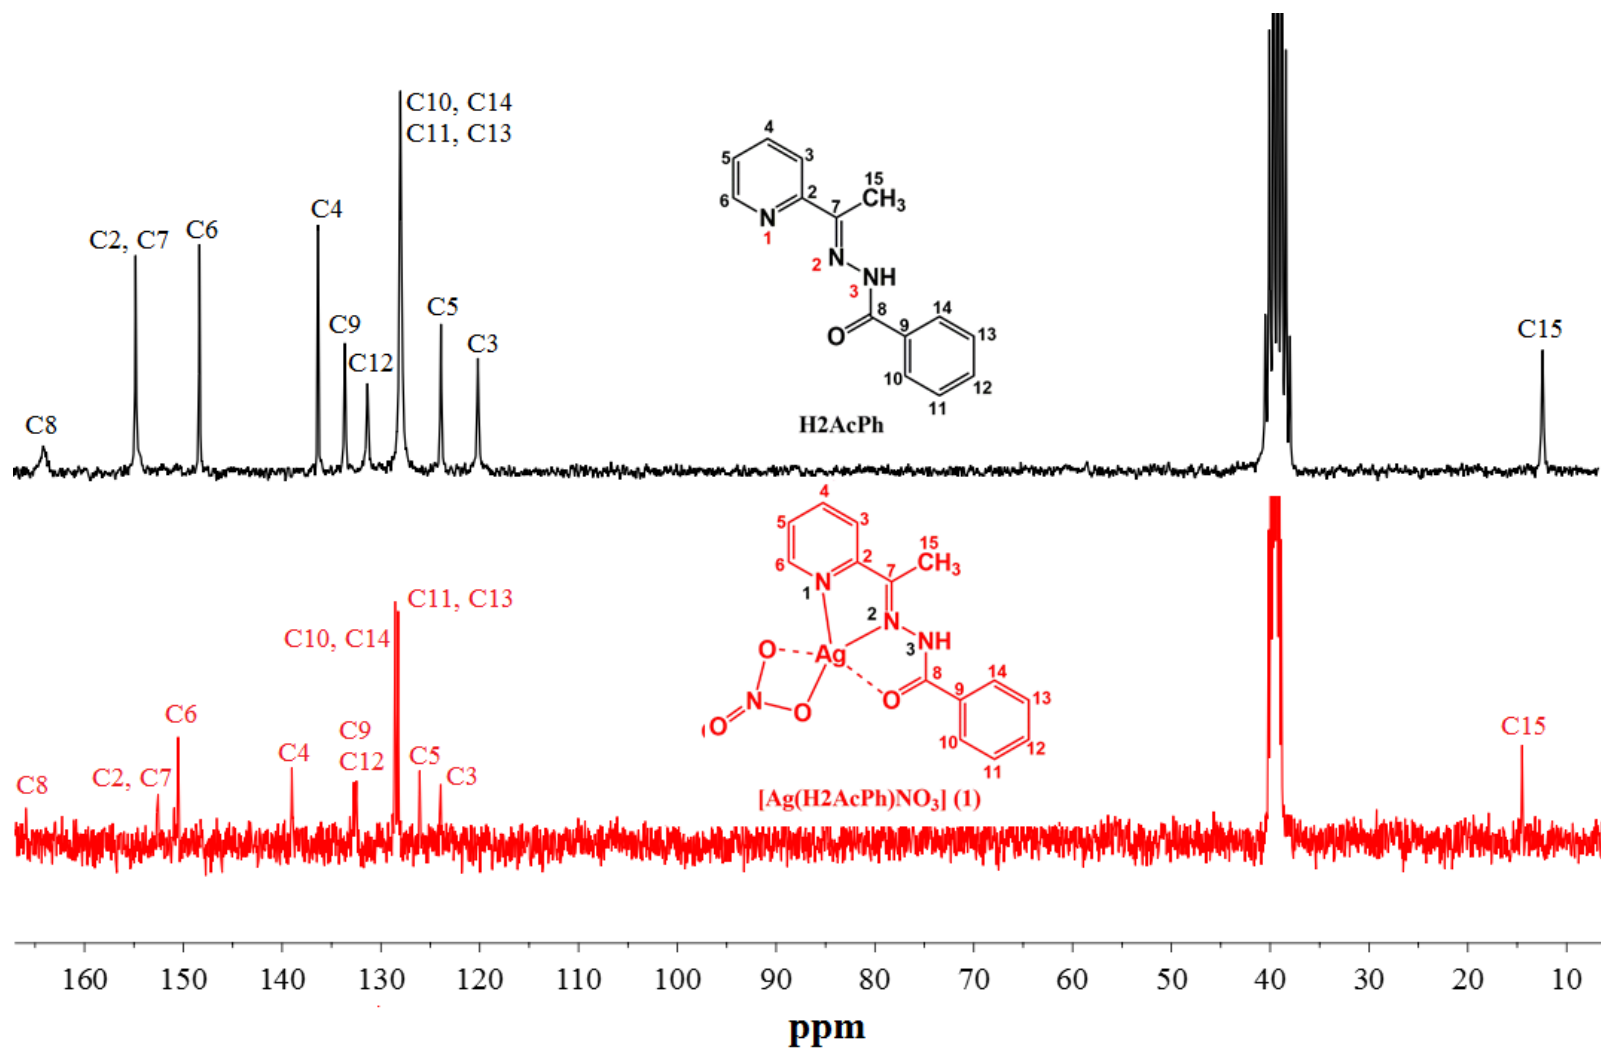

**Fig. S8**  $^{13}\text{C}\{^1\text{H}\}$  NMR spectrum of  $\text{H}_2\text{AcPh}$  (black) and  $[\text{Ag}(\text{H}_2\text{AcPh})\text{NO}_3]$  (1) (red) registered in  $\text{DMSO-}d_6$  at  $25^\circ\text{C}$ .

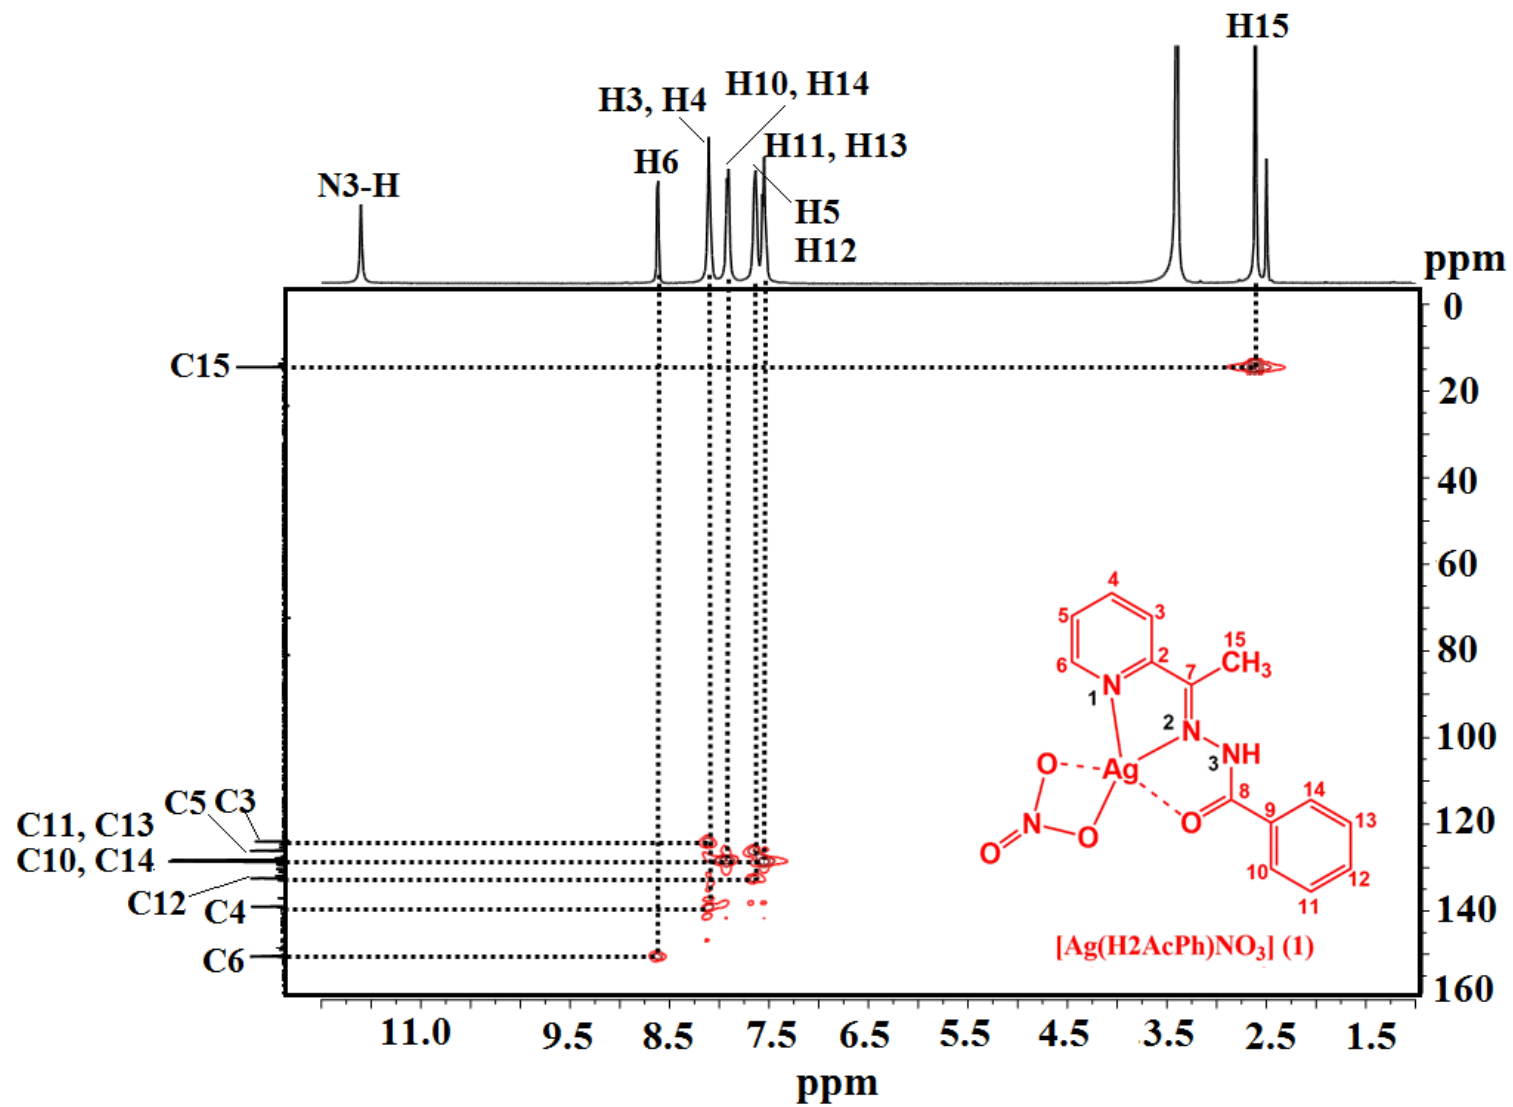

Fig. S9 HMQC ( $^1\text{H}$ - $^{13}\text{C}\{^1\text{H}\}$ ) contour map of  $[\text{Ag}(\text{H}_2\text{AcPh})\text{NO}_3]$  (1) registered in  $\text{DMSO}-d_6$  at  $25^\circ\text{C}$ .

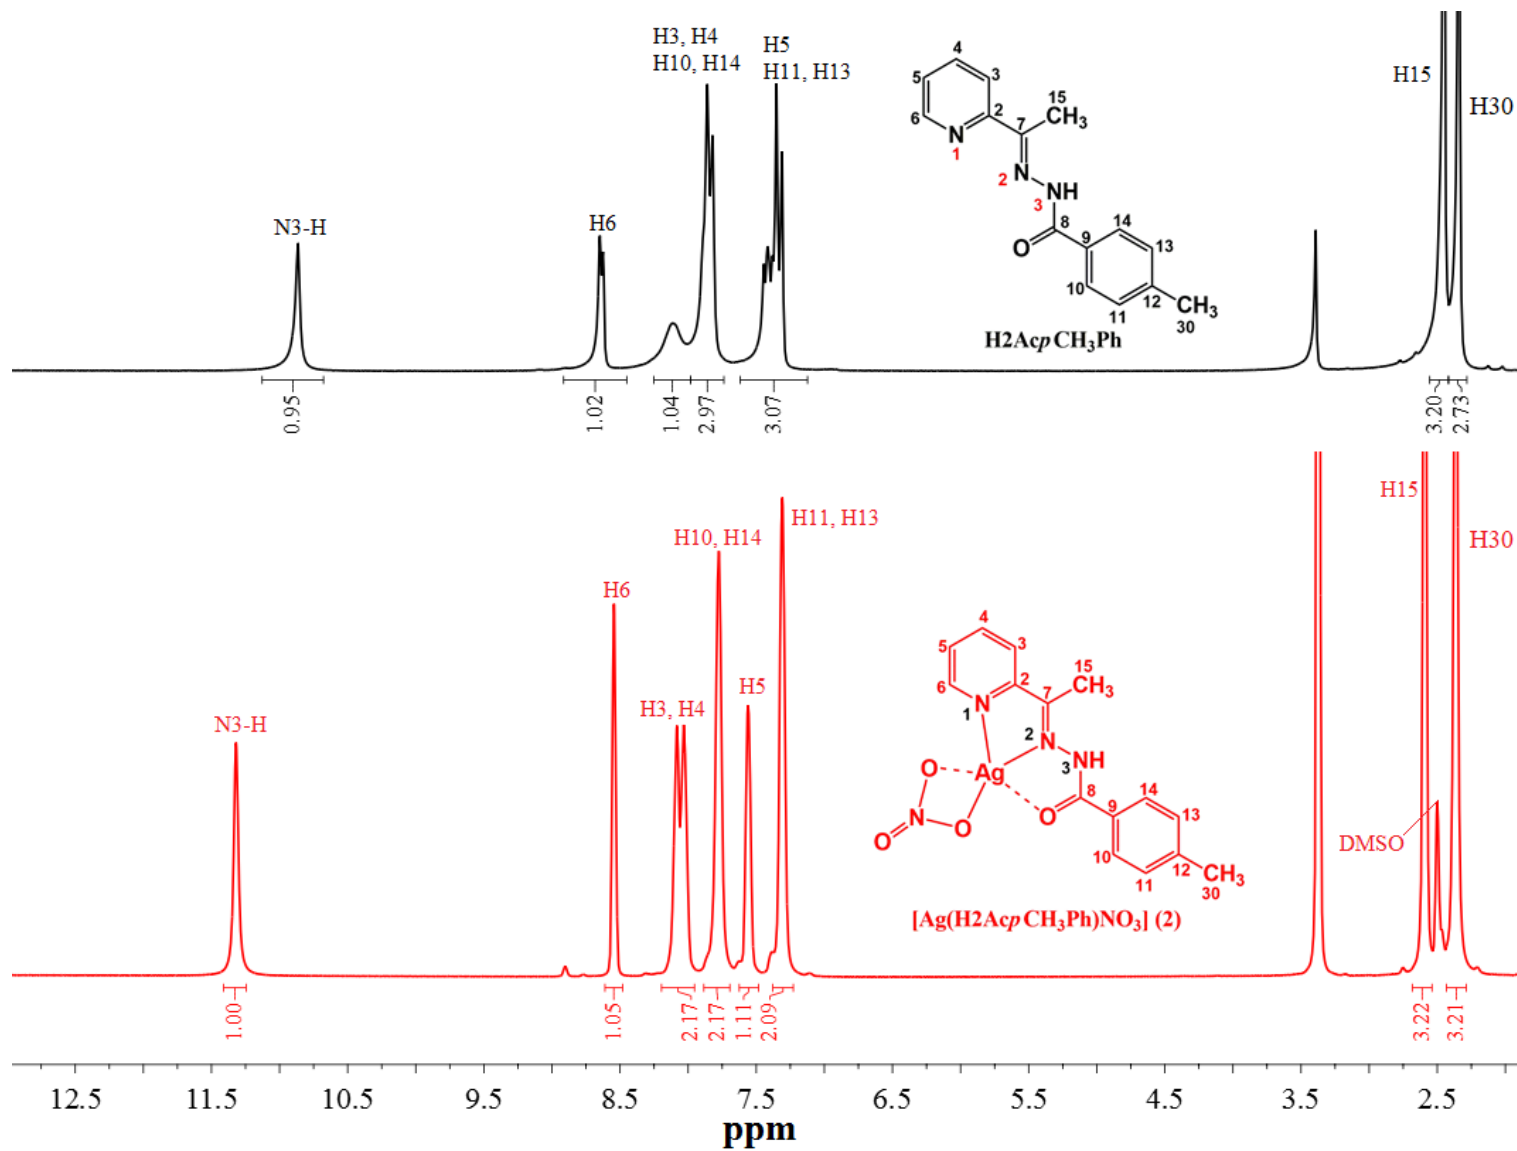

**Fig. S10** <sup>1</sup>H NMR spectrum of H<sub>2</sub>AcpCH<sub>3</sub>Ph (black) and [Ag(H<sub>2</sub>AcpCH<sub>3</sub>Ph)NO<sub>3</sub>] (2) (red) registered in DMSO-*d*<sub>6</sub> at 25°C.

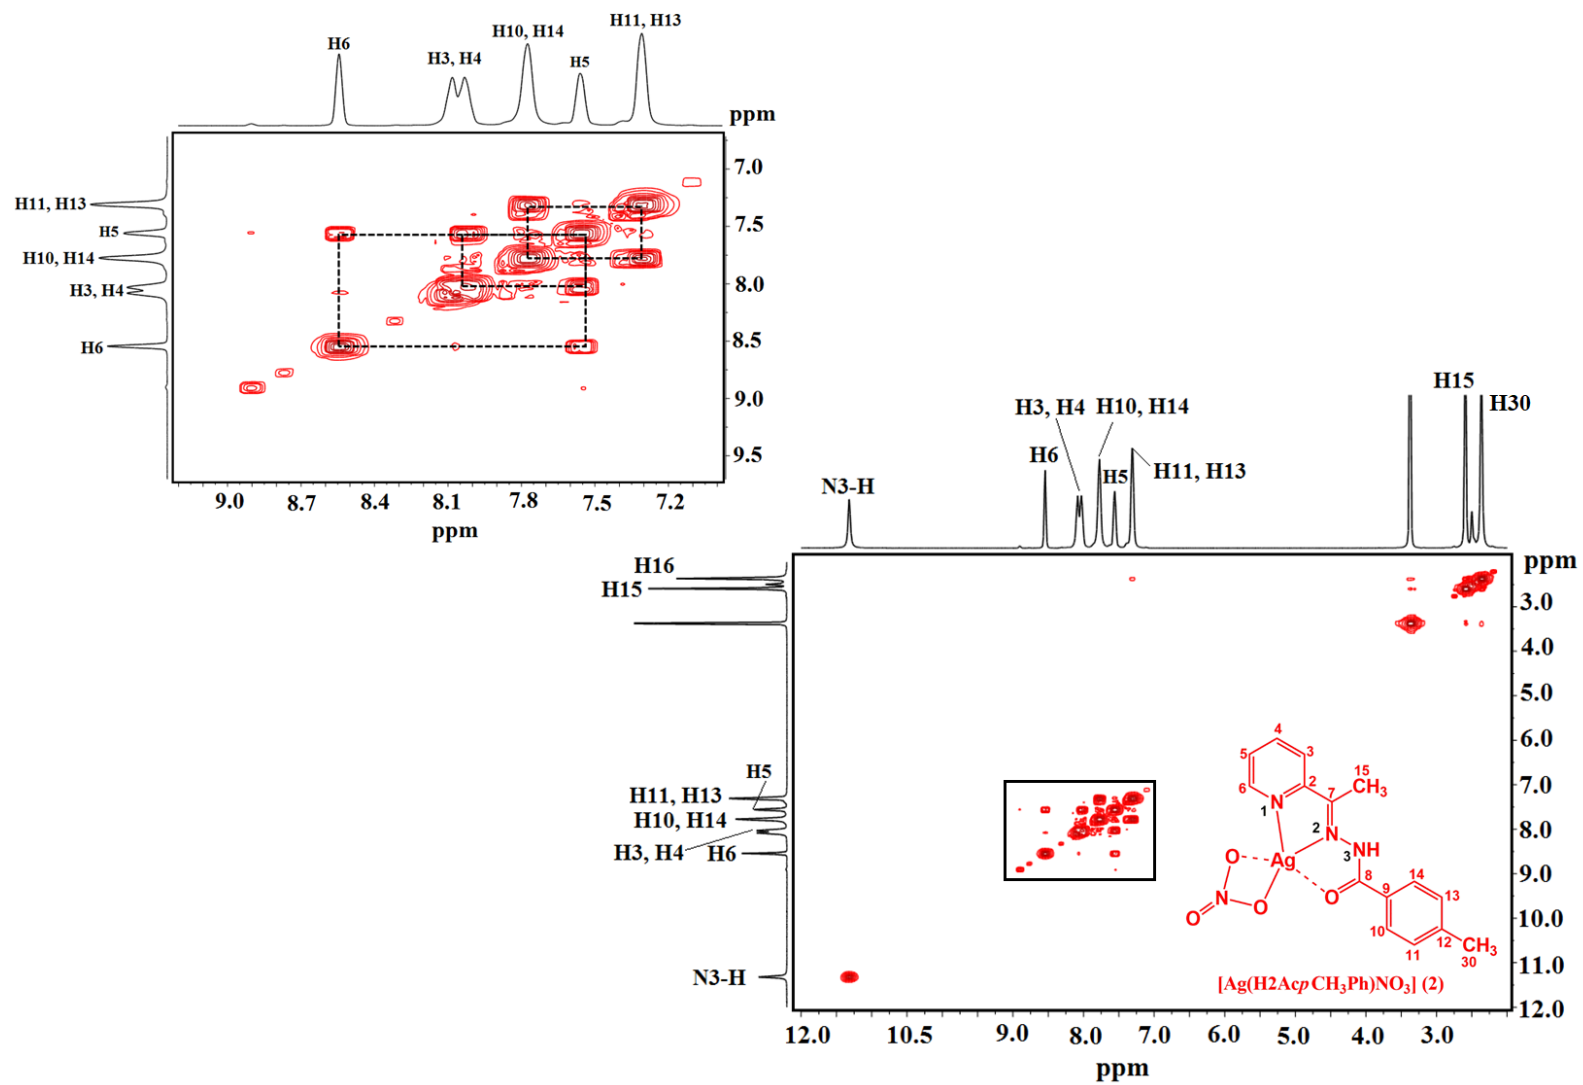

**Fig. S11** COSY ( $^1\text{H}$ - $^1\text{H}$ ) contour map of  $[\text{Ag}(\text{H}_2\text{AcpCH}_3\text{Ph})\text{NO}_3] \text{ (2)}$  registered in  $\text{DMSO-}d_6$  at  $25^\circ\text{C}$ .

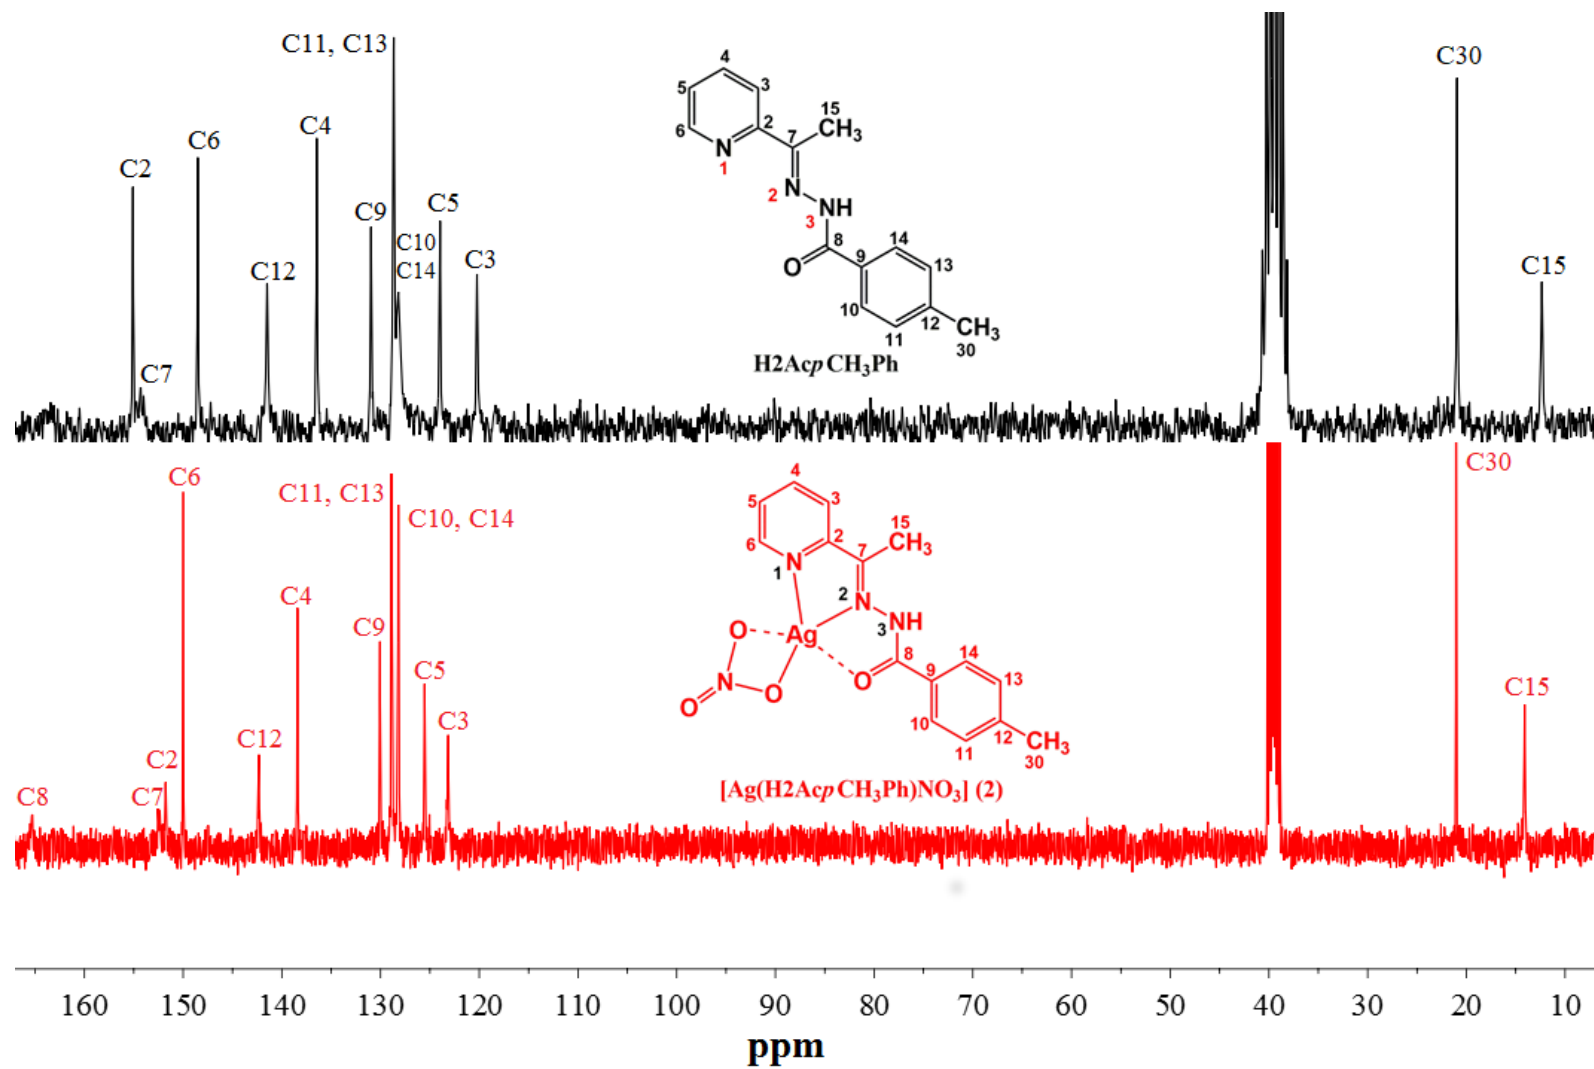

**Fig. S12**  $^{13}\text{C}\{^1\text{H}\}$  NMR spectrum of  $\text{H}_2\text{AcpCH}_3\text{Ph}$  (black) and  $[\text{Ag}(\text{H}_2\text{AcpCH}_3\text{Ph})\text{NO}_3] (\mathbf{2})$  (red) registered in  $\text{DMSO-}d_6$  at  $25^\circ\text{C}$ .

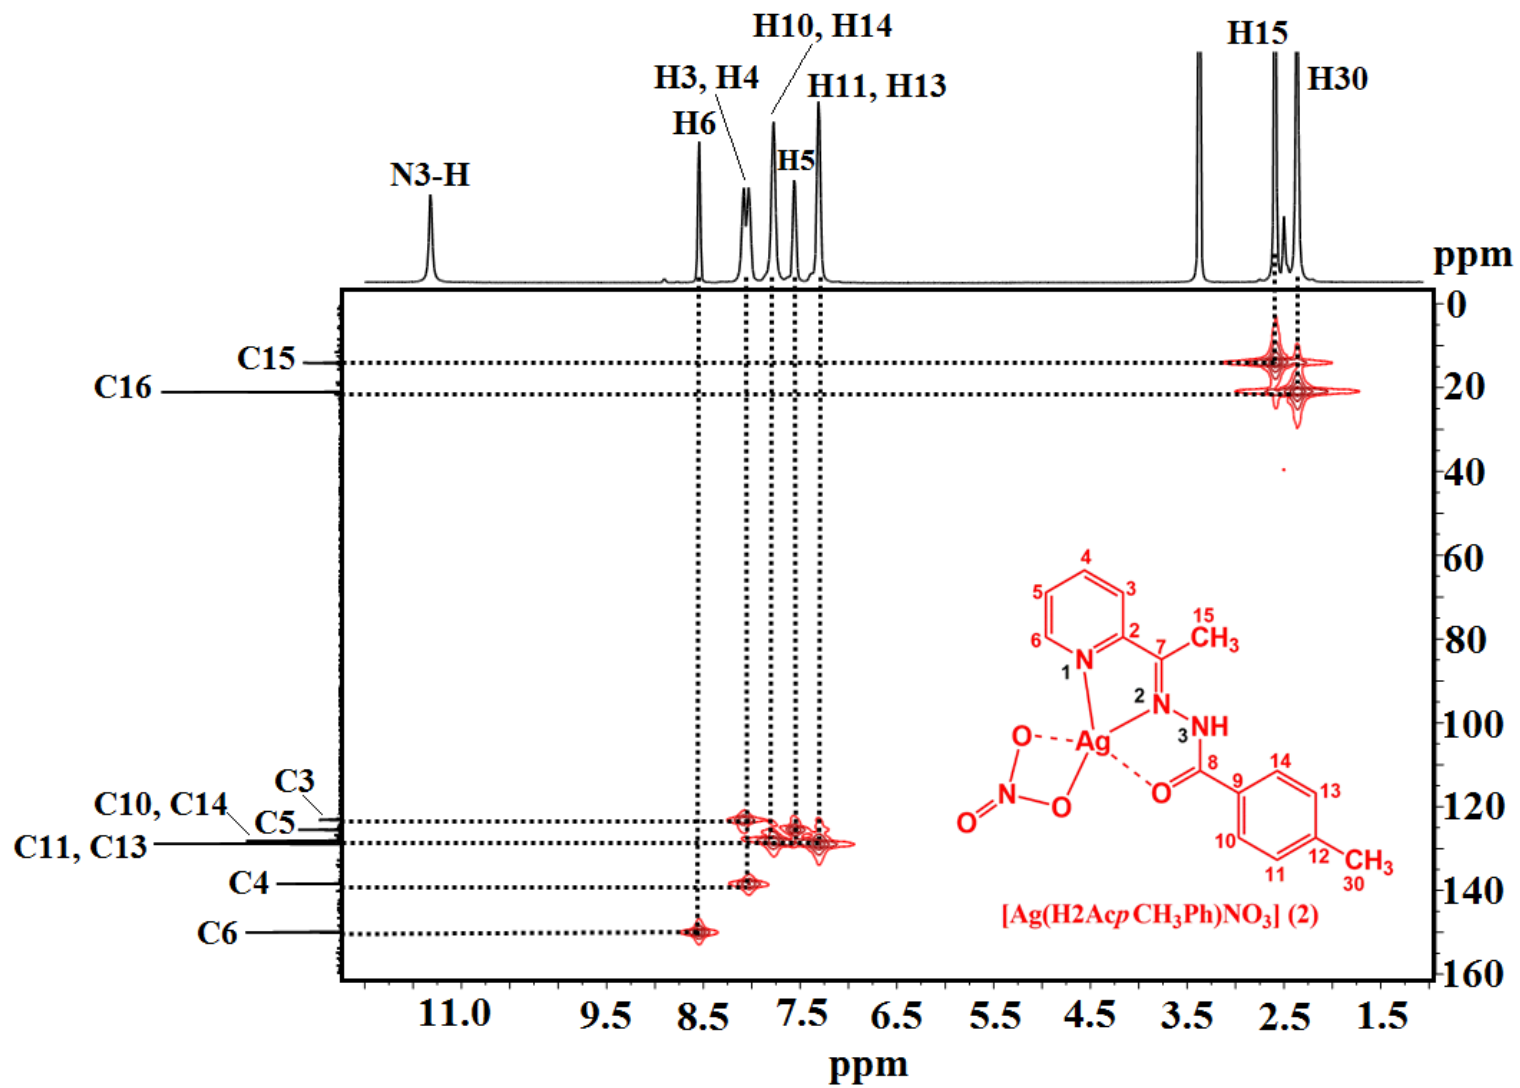

Fig. S13 HMQC ( $^1\text{H}$ - $^{13}\text{C}\{^1\text{H}\}$ ) contour map of  $[\text{Ag}(\text{H}_2\text{AcpCH}_3\text{Ph})\text{NO}_3] (2)$  registered in  $\text{DMSO-}d_6$  at  $25^\circ\text{C}$ .

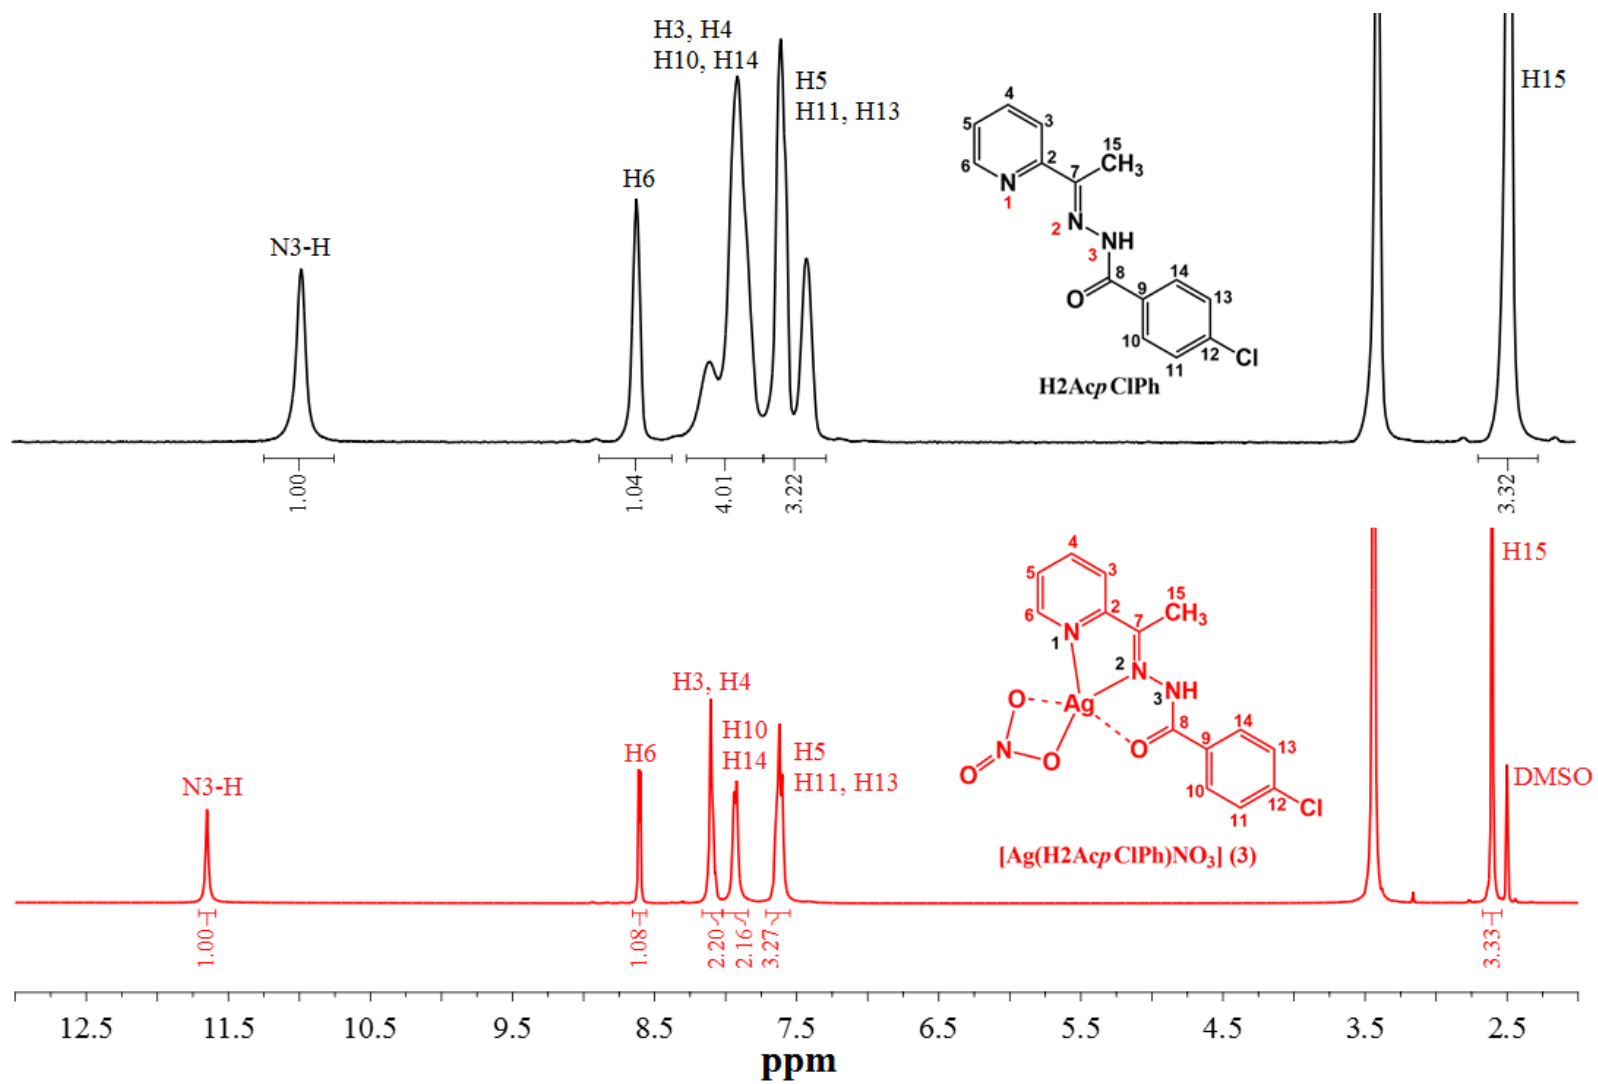

**Fig. S14**  $^1\text{H}$  NMR spectrum of  $\text{H}_2\text{AcpClPh}$  (black) and  $[\text{Ag}(\text{H}_2\text{AcpClPh})\text{NO}_3]$  (**3**) (red) registered in  $\text{DMSO-}d_6$  at  $25^\circ\text{C}$ .



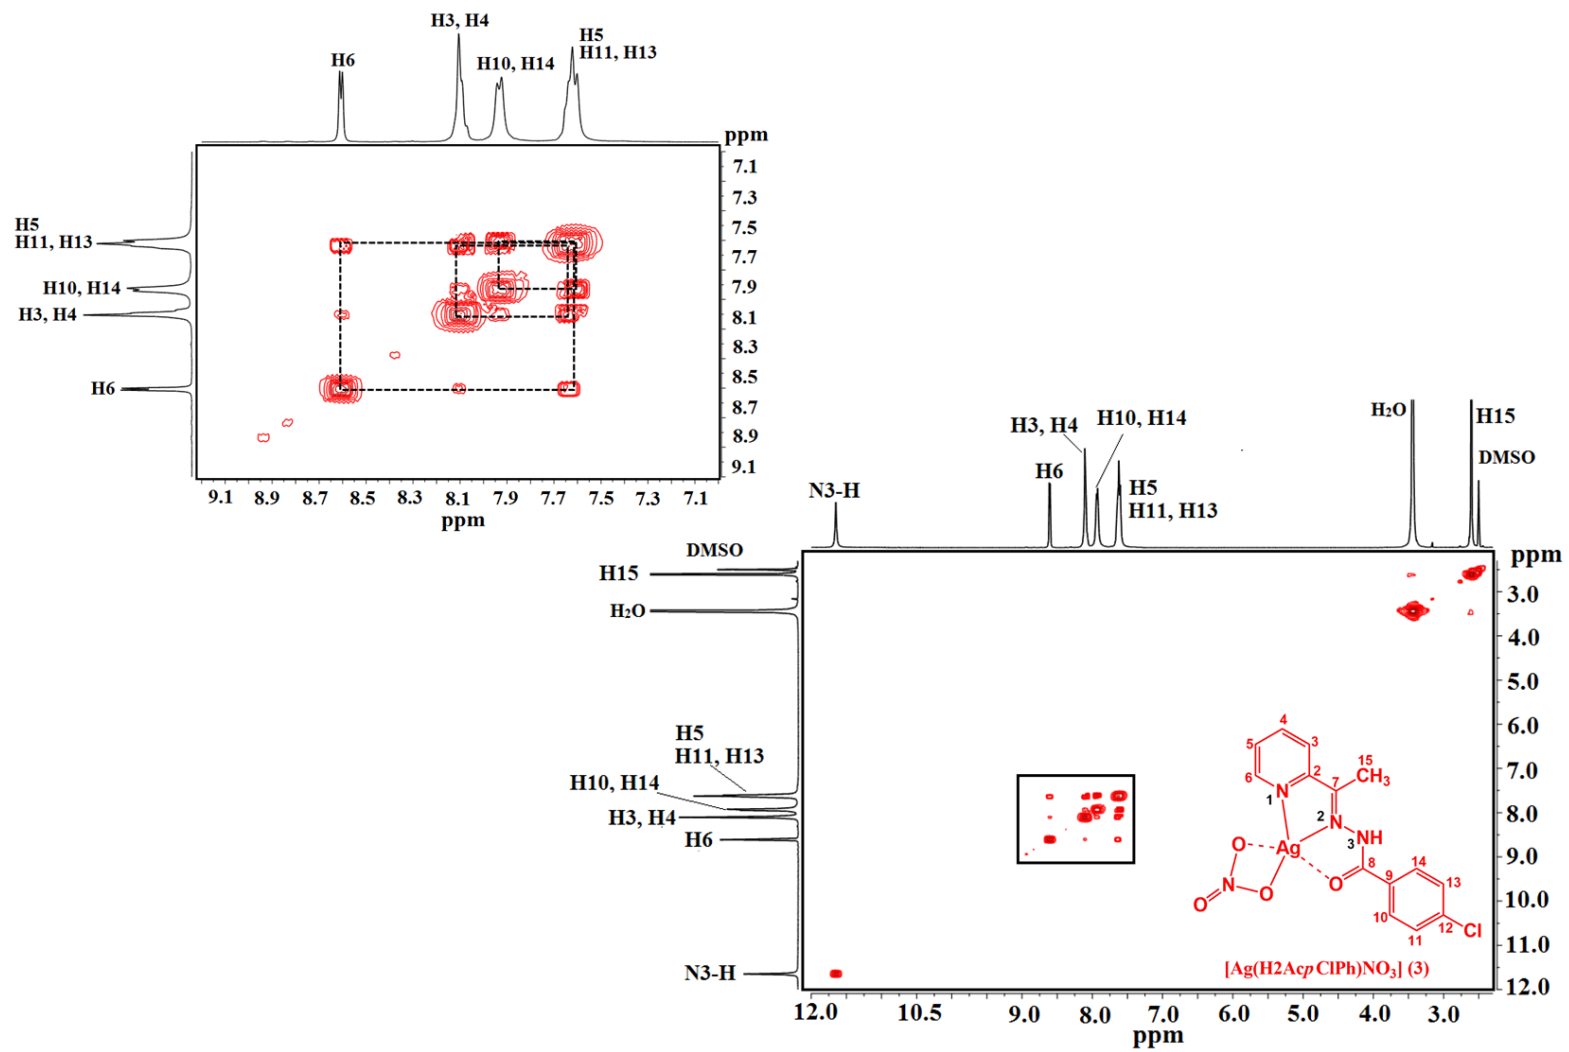

**Fig. S15** COSY ( $^1\text{H-}^1\text{H}$ ) contour map of  $[\text{Ag}(\text{H}_2\text{AcpClPh})\text{NO}_3]$  (**3**) registered in  $\text{DMSO-}d_6$  at  $25^\circ\text{C}$ .

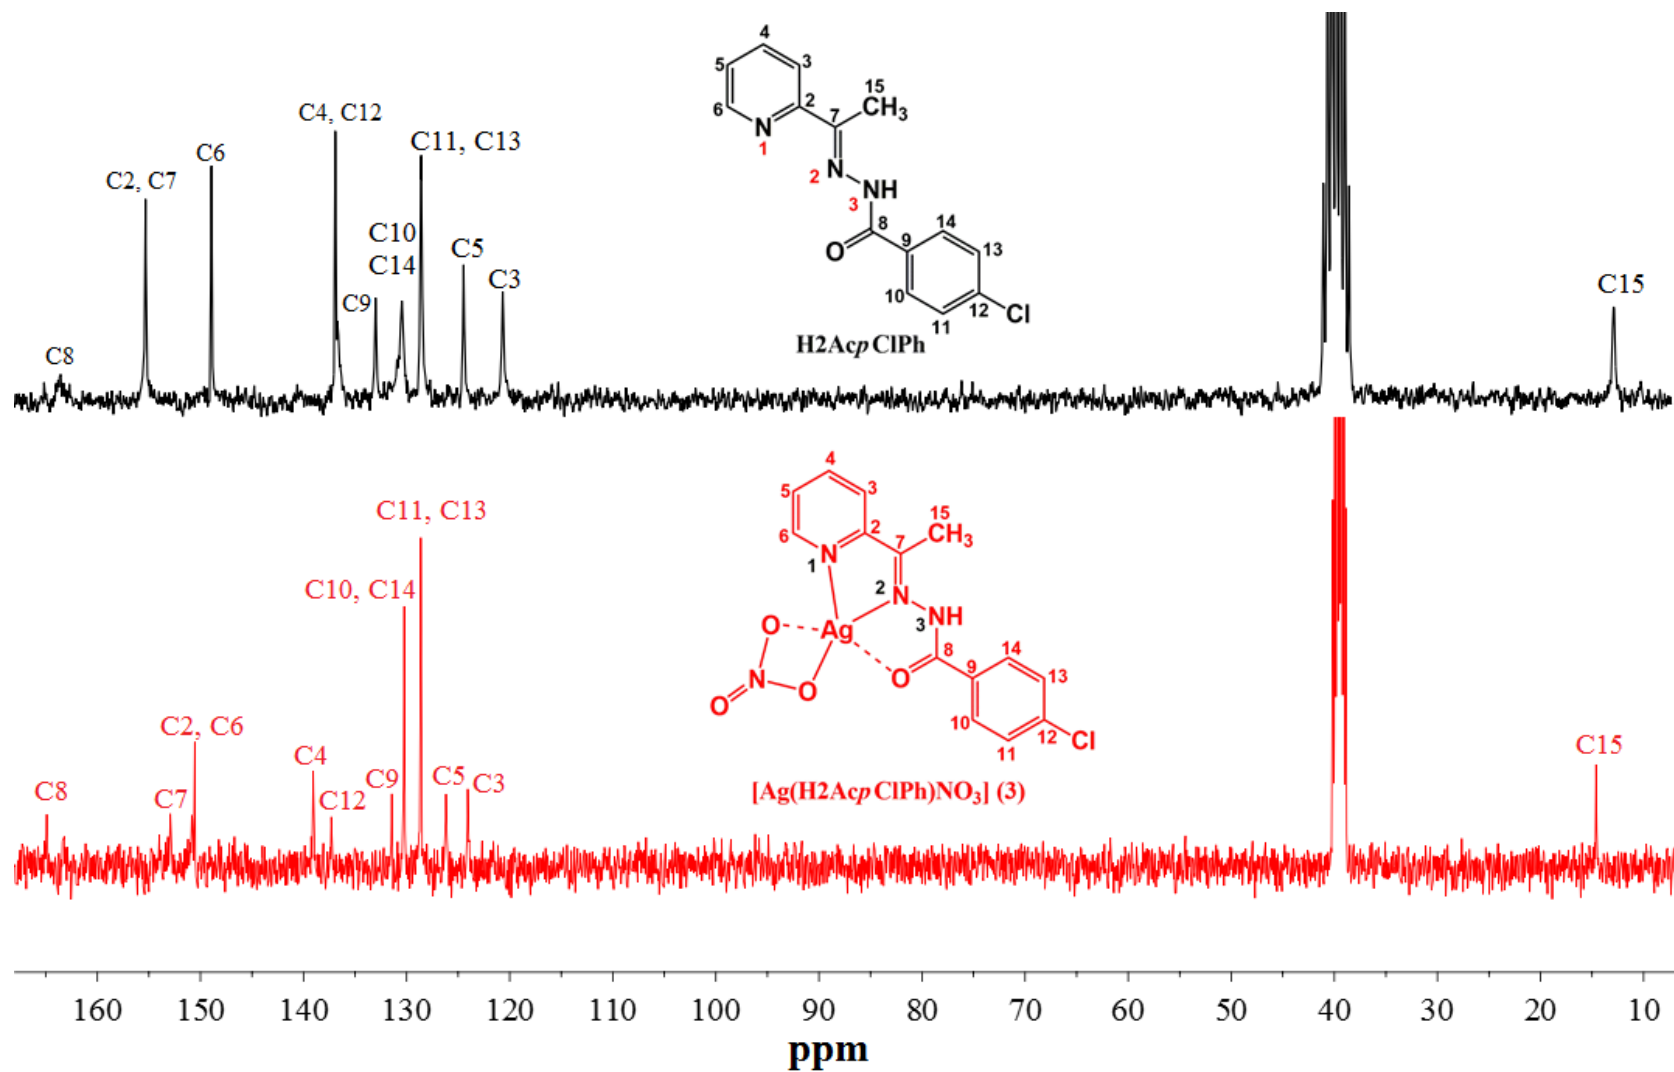

**Fig. S16**  $^{13}\text{C}\{^1\text{H}\}$  NMR spectrum of  $\text{H}_2\text{AcpClPh}$  (black) and  $[\text{Ag}(\text{H}_2\text{AcpClPh})\text{NO}_3]$  (**3**) (red) registered in  $\text{DMSO-}d_6$  at  $25^\circ\text{C}$ .

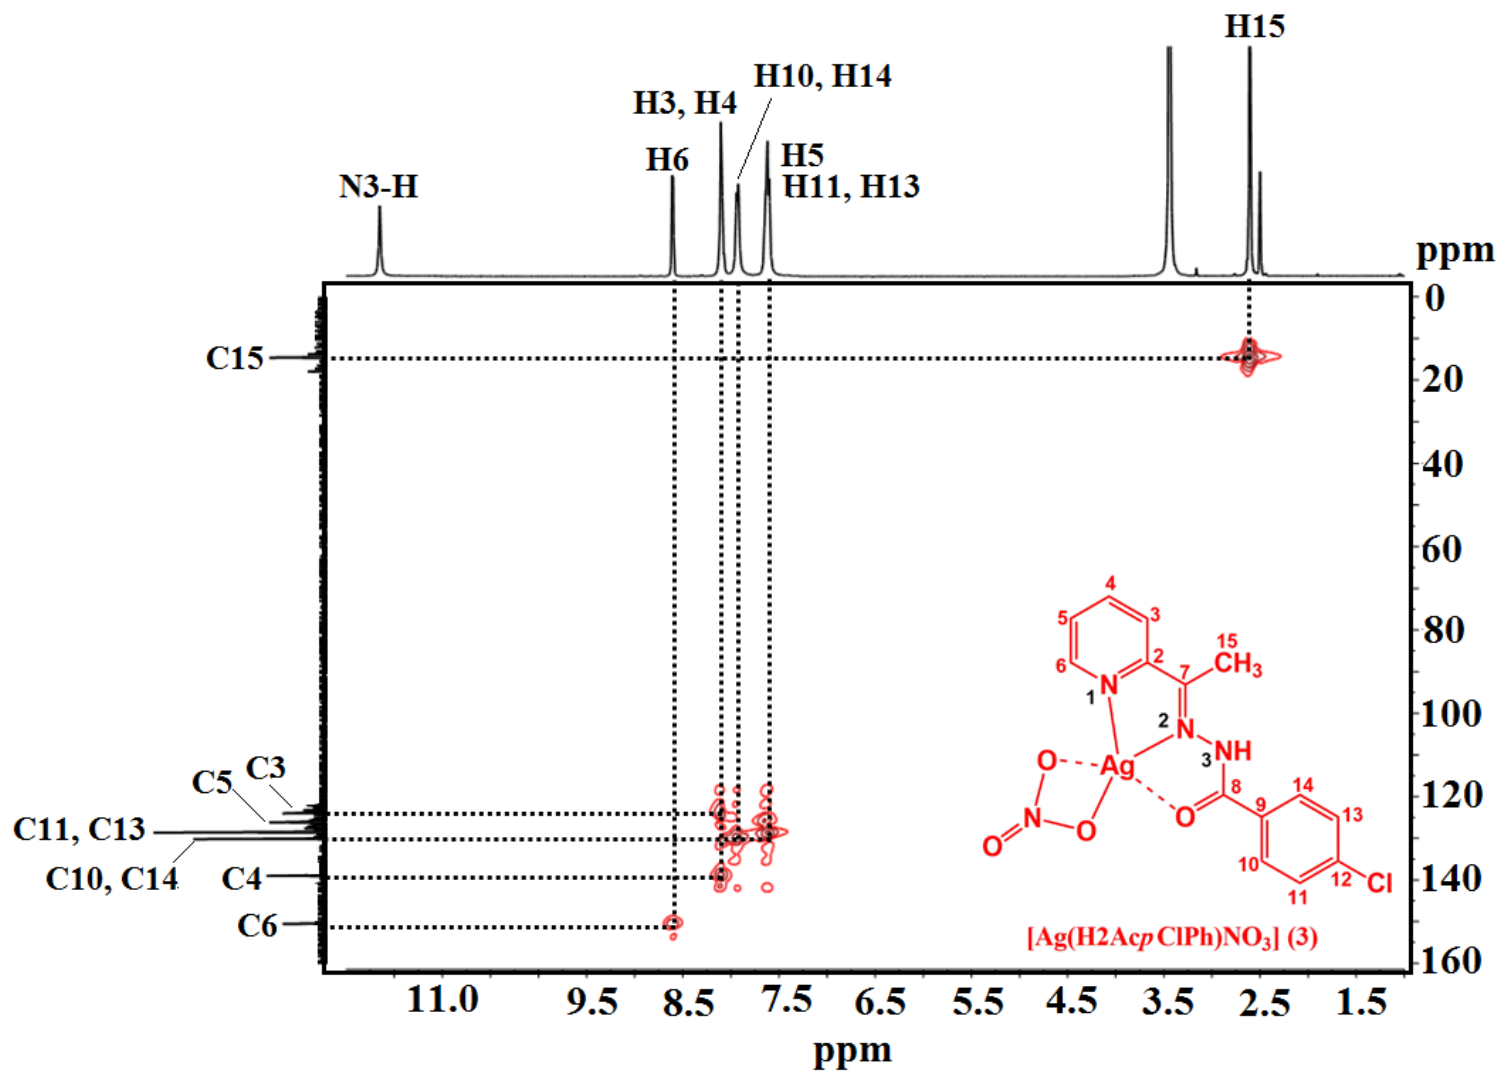

Fig. S17 HMQC ( $^1\text{H}$ - $^{13}\text{C}\{^1\text{H}\}$ ) contour map of  $[\text{Ag}(\text{H}_2\text{AcpClPh})\text{NO}_3]$  (3) registered in  $\text{DMSO-}d_6$  at  $25^\circ\text{C}$ .

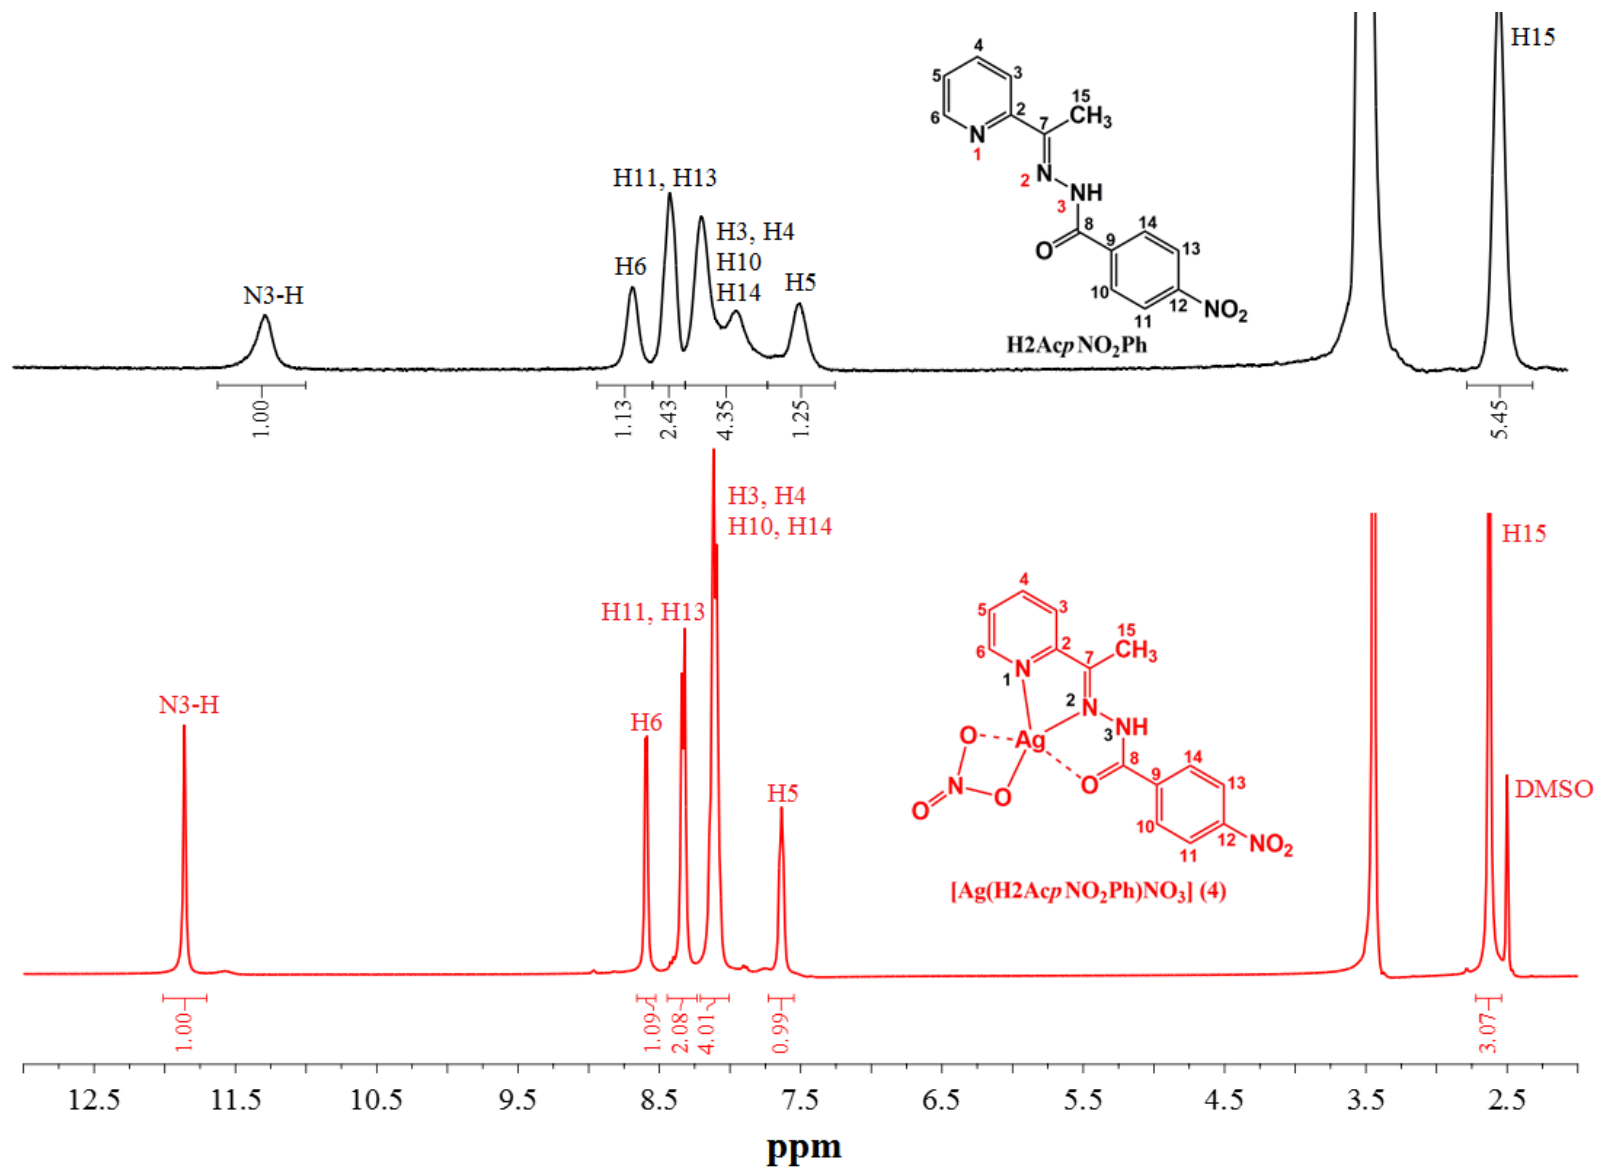

**Fig. S18**  $^1\text{H}$  NMR spectrum of  $\text{H}_2\text{AcpNO}_2\text{Ph}$  (black) and  $[\text{Ag}(\text{H}_2\text{AcpNO}_2\text{Ph})\text{NO}_3]$  (**4**) (red) registered in  $\text{DMSO-}d_6$  at  $25^\circ\text{C}$ .

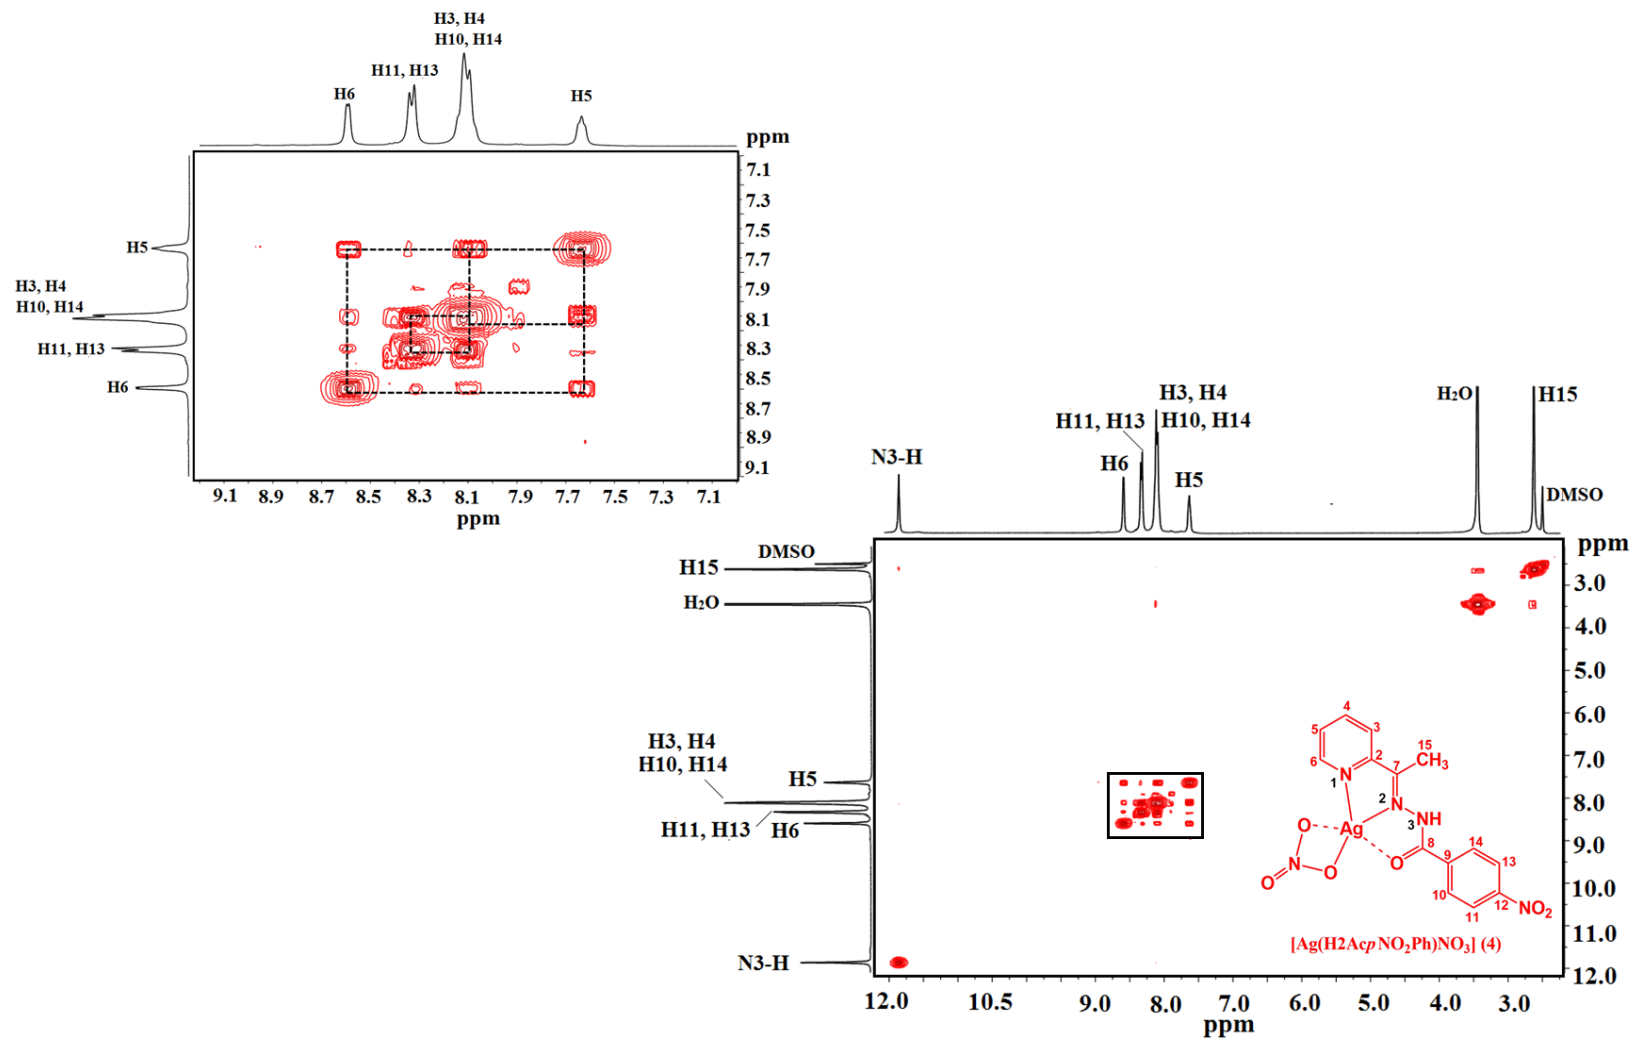

**Fig. S19** COSY ( $^1\text{H}$ - $^1\text{H}$ ) contour map of  $[\text{Ag}(\text{H}_2\text{AcpNO}_2\text{Ph})\text{NO}_3]$  (4) registered in  $\text{DMSO-}d_6$  at  $25^\circ\text{C}$ .

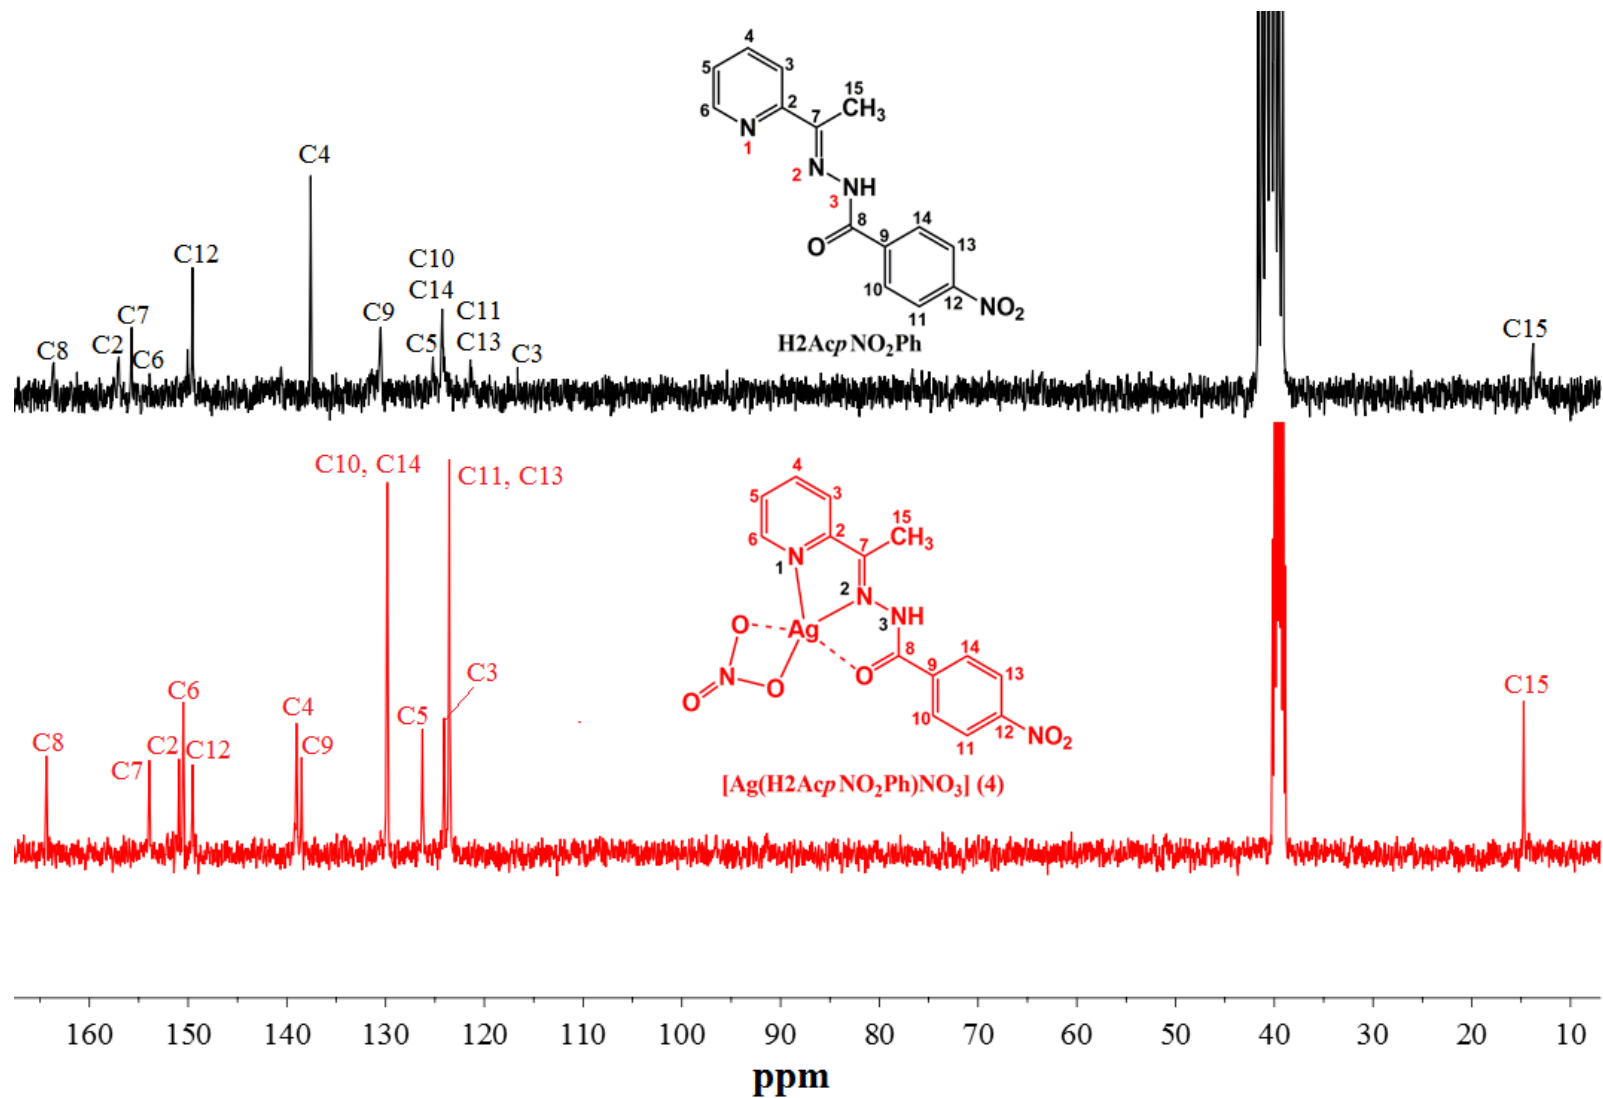

**Fig. S20**  $^{13}\text{C}\{^1\text{H}\}$  NMR spectrum of  $\text{H}_2\text{AcpNO}_2\text{Ph}$  (black) and  $[\text{Ag}(\text{H}_2\text{AcpNO}_2\text{Ph})\text{NO}_3]$  (**4**) (red) registered in  $\text{DMSO-}d_6$  at  $25^\circ\text{C}$ .

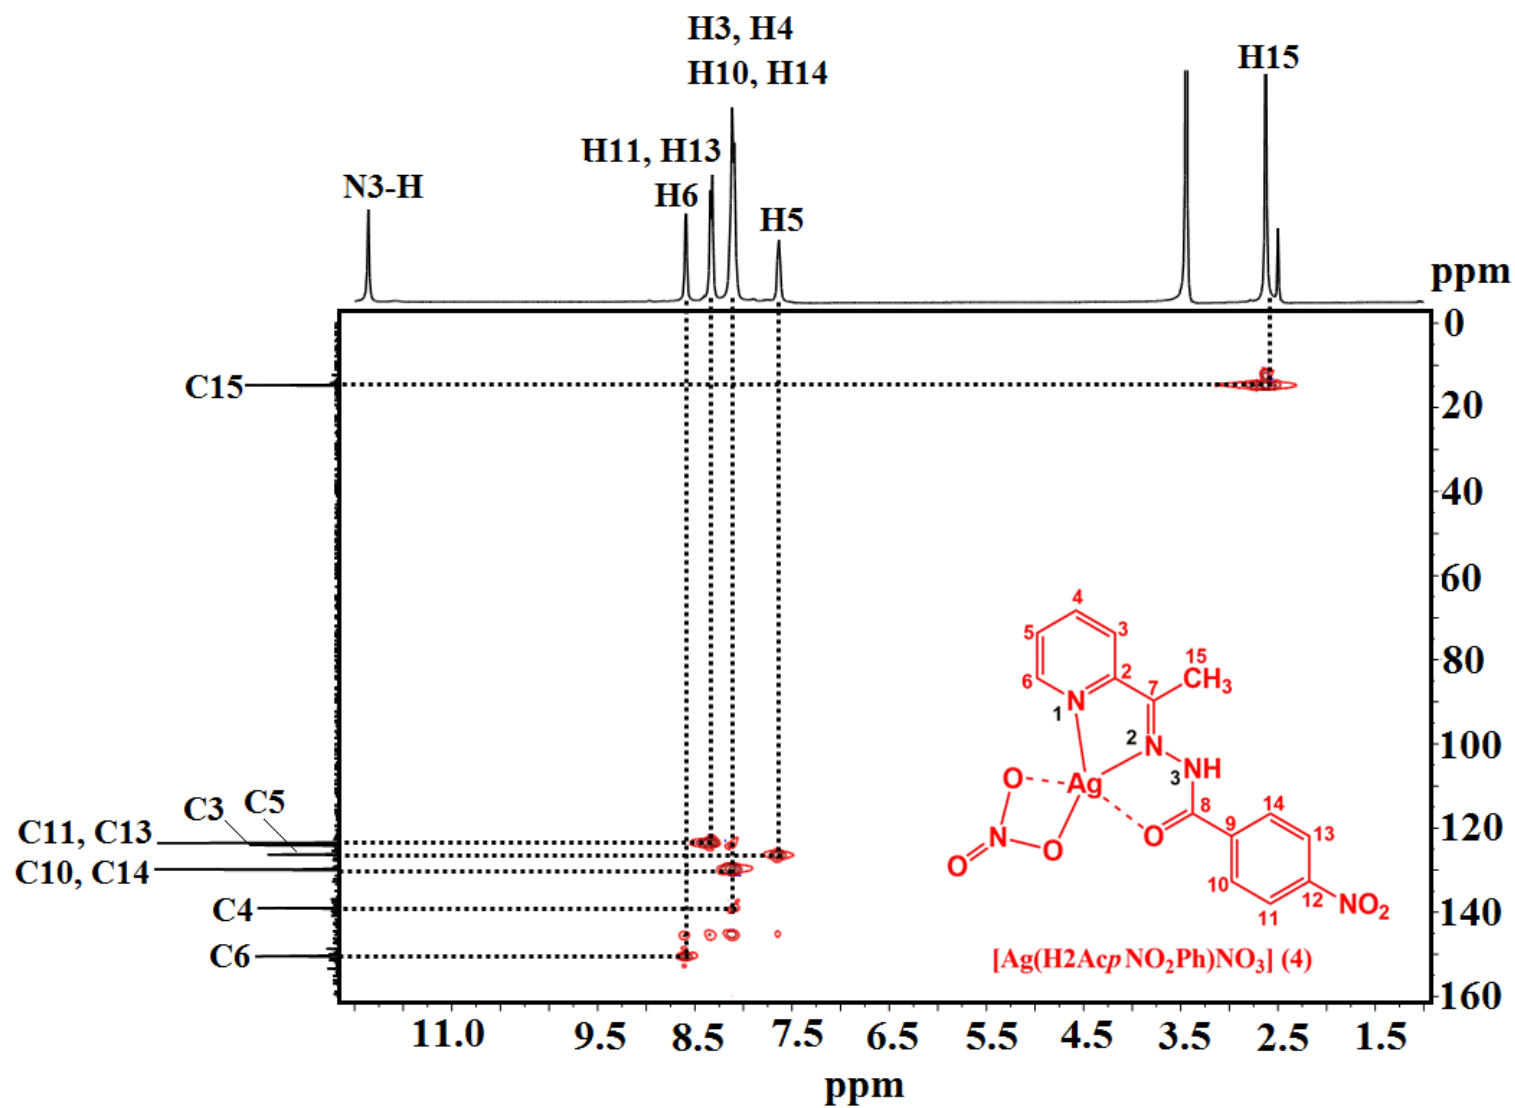

Fig. S21 HMQC ( $^1\text{H}$ - $^{13}\text{C}\{^1\text{H}\}$ ) contour map of  $[\text{Ag}(\text{H}_2\text{AcpNO}_2\text{Ph})\text{NO}_3]$  (4) registered in  $\text{DMSO-}d_6$  at  $25^\circ\text{C}$ .

Mass spectra (ESI) of silver(I) complexes (1-4)

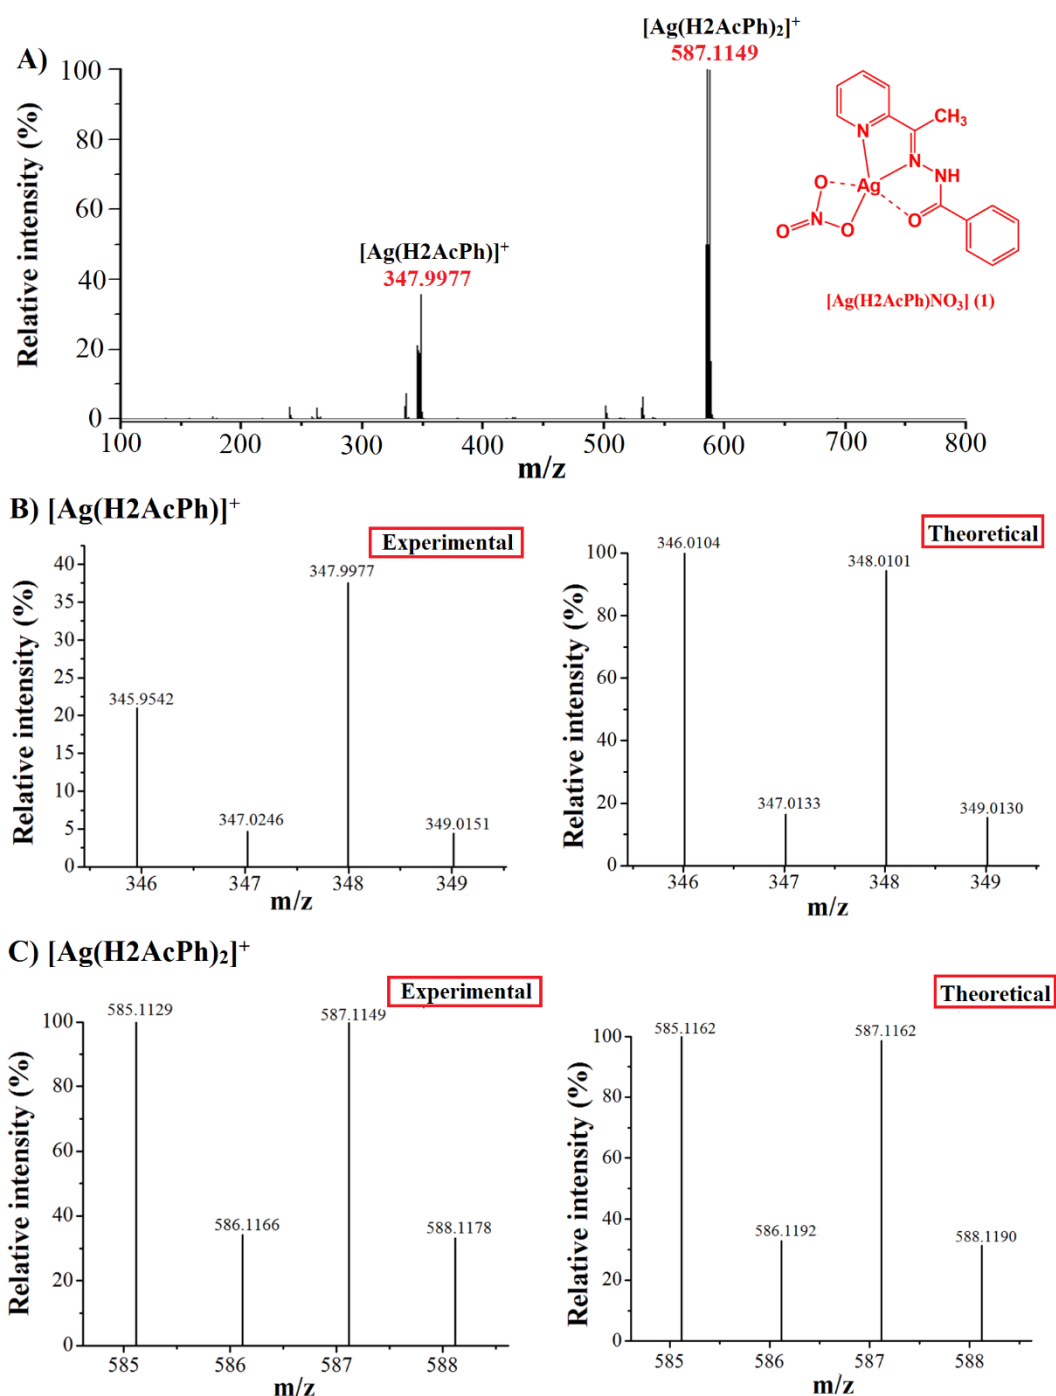

**Fig. S22** A) Mass spectrum ESI-MS (+) of  $[\text{Ag}(\text{H}_2\text{AcPh})\text{NO}_3]$  (**1**). B) Comparison between the experimental ( $m/z$  347.9977) and theoretical ( $m/z$  348.0101) isotopic pattern of the species  $[\text{Ag}(\text{H}_2\text{AcPh})]^+$ . C) Comparison between the experimental ( $m/z$  587.1149) and theoretical ( $m/z$  587.1162) isotopic pattern of the species  $[\text{Ag}(\text{H}_2\text{AcPh})_2]^+$ .



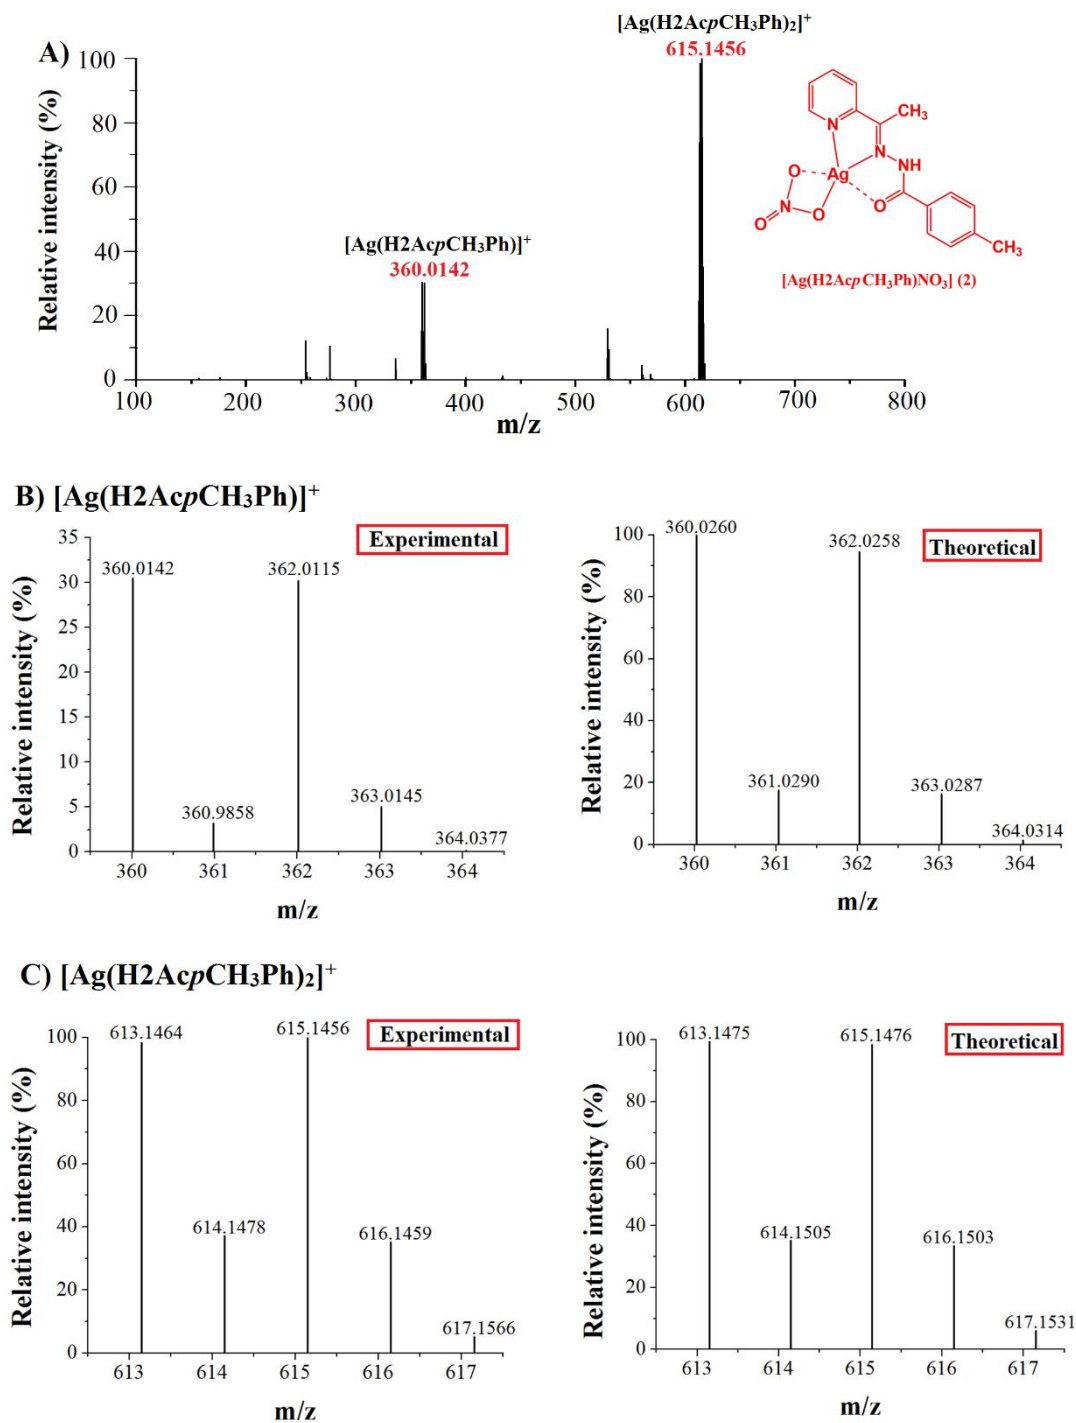

**Fig. S23** A) Mass spectrum ESI-MS (+) of  $[\text{Ag}(\text{H}2\text{AcpCH}_3\text{Ph})\text{NO}_3]$  (**2**). B) Comparison between the experimental ( $m/z$  360.0142) and theoretical ( $m/z$  360.0260) isotopic pattern of the species  $[\text{Ag}(\text{H}2\text{AcpCH}_3\text{Ph})]^+$ . C) Comparison between the experimental ( $m/z$  615.1456) and theoretical ( $m/z$  615.1476) isotopic pattern of the species  $[\text{Ag}(\text{H}2\text{AcpCH}_3\text{Ph})_2]^+$ .

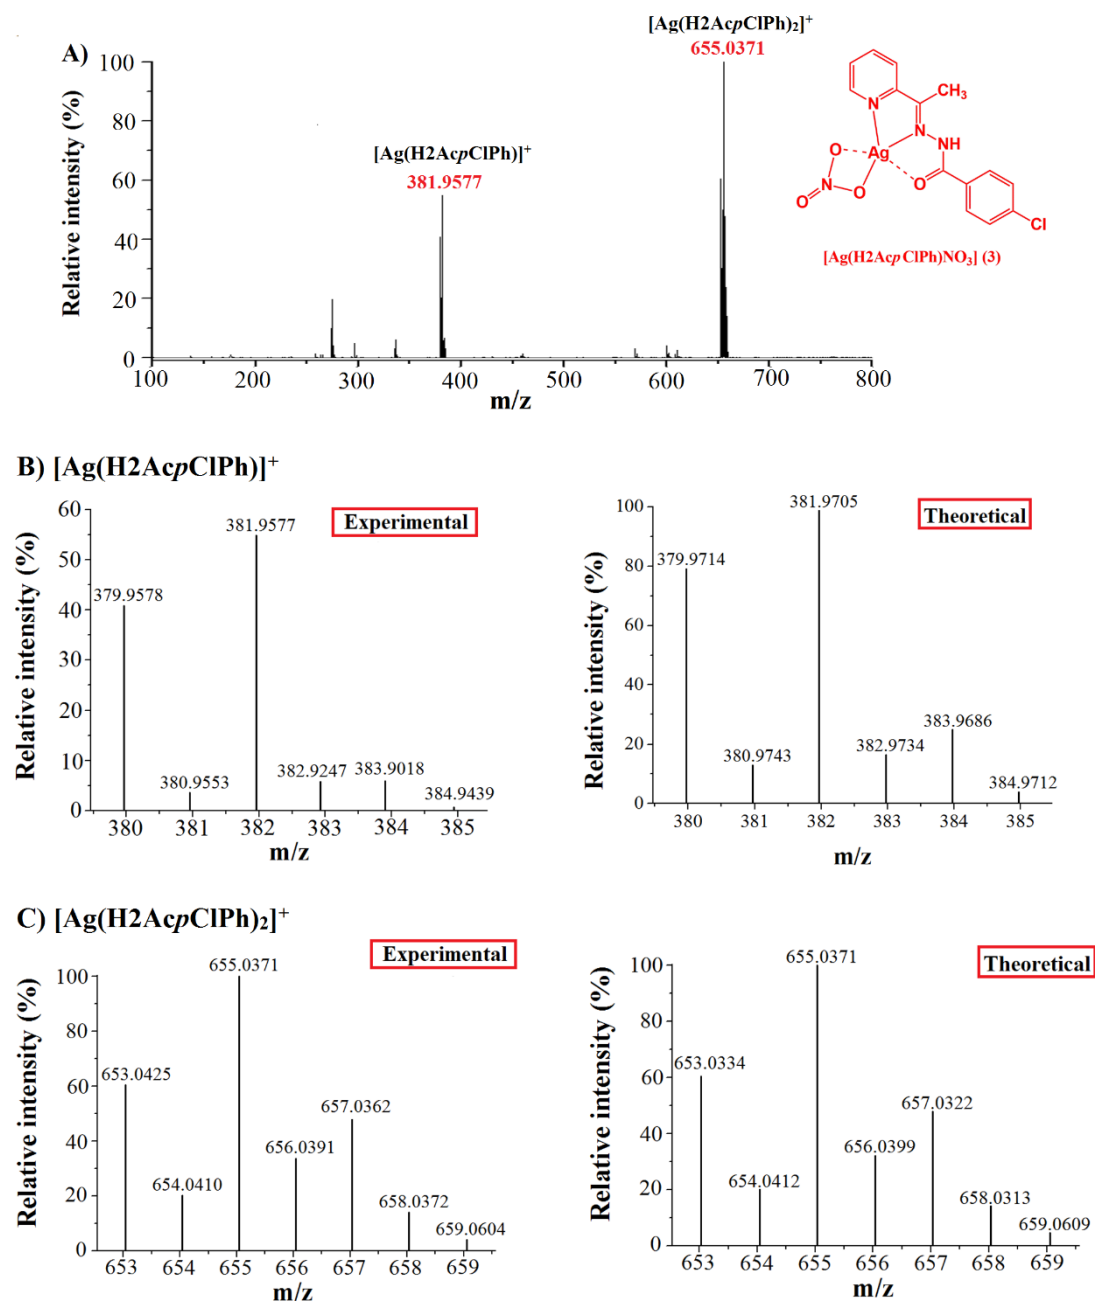

**Fig. S24** A) Mass spectrum ESI-MS (+) of  $[\text{Ag}(\text{H}_2\text{AcpClPh})\text{NO}_3]$  (**3**). B) Comparison between the experimental ( $m/z$  381.9577) and theoretical ( $m/z$  381.9705) isotopic pattern of the species  $[\text{Ag}(\text{H}_2\text{AcpClPh})]^+$ . C) Comparison between the experimental ( $m/z$  655.0371) and theoretical ( $m/z$  655.0371) isotopic pattern of the species  $[\text{Ag}(\text{H}_2\text{AcpClPh})_2]^+$ .

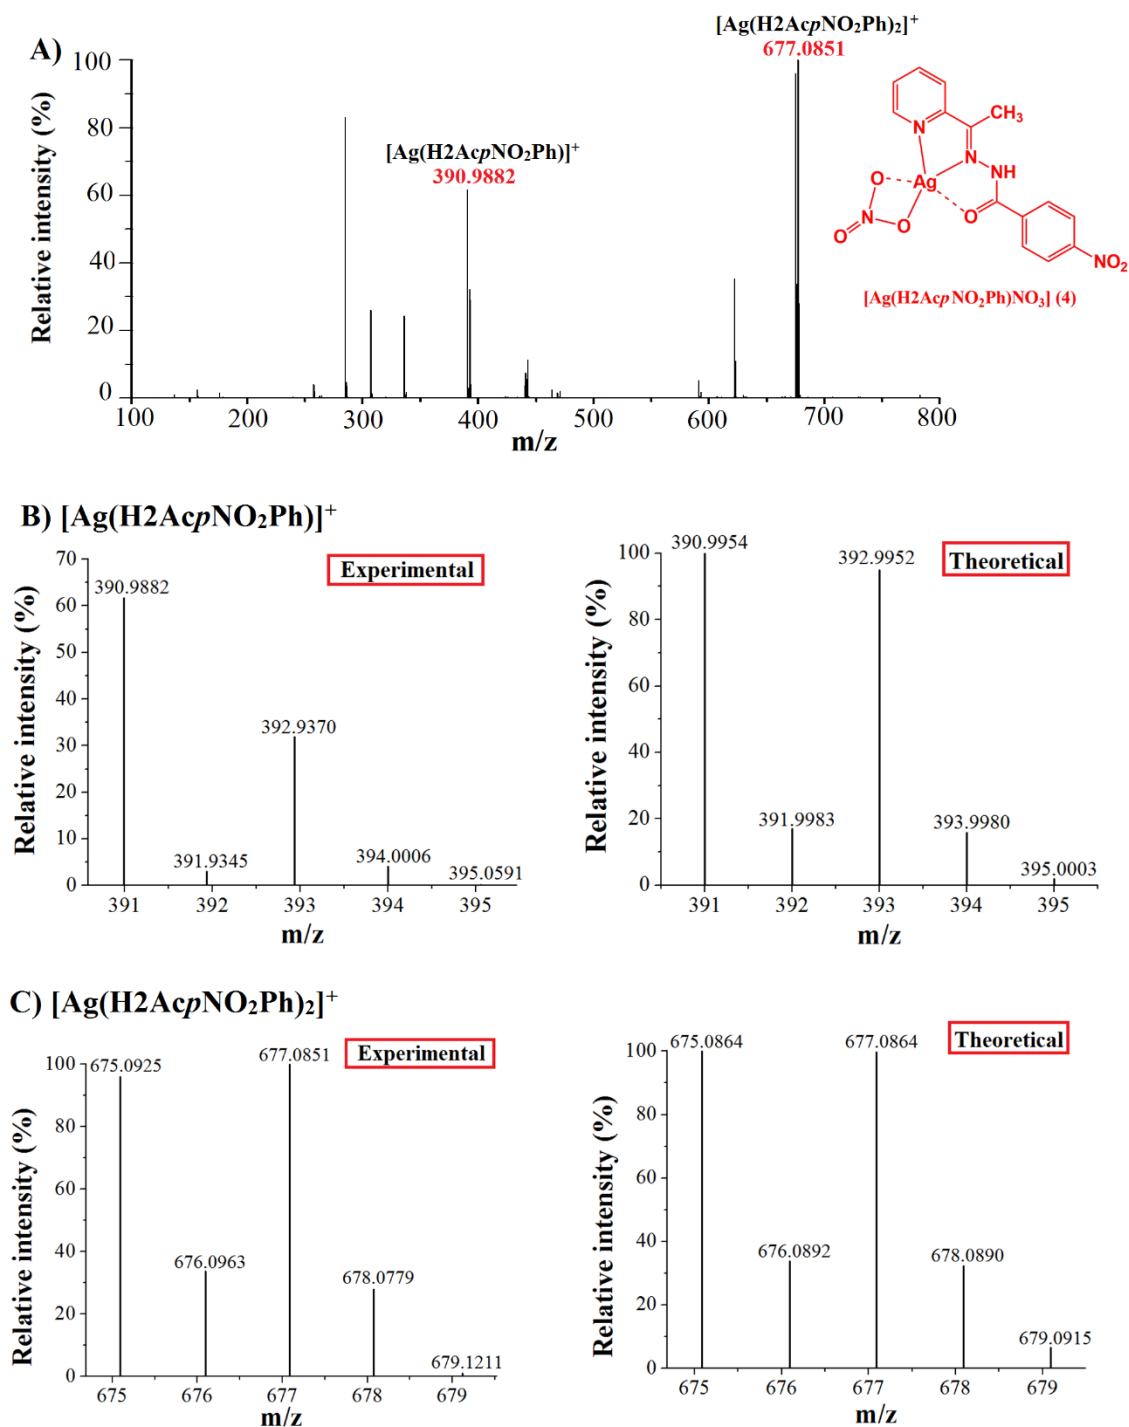

**Fig. S25** A) Mass spectrum ESI-MS (+) of  $[\text{Ag}(\text{H2AcpNO}_2\text{Ph})\text{NO}_3]^+$  (**4**). B) Comparison between the experimental ( $m/z$  390.9882) and theoretical ( $m/z$  390.9954) isotopic pattern of the species  $[\text{Ag}(\text{H2AcpNO}_2\text{Ph})]^+$ . C) Comparison between the experimental ( $m/z$  677.0851) and theoretical ( $m/z$  677.0864) isotopic pattern of the species  $[\text{Ag}(\text{H2AcpNO}_2\text{Ph})_2]^+$ .

*X-ray crystallography*

**Table S1** Crystal data and structure refinement results for [Ag(H2AcPh)NO<sub>3</sub>] (**1**), [Ag(H2Ac $\rho$ CH<sub>3</sub>Ph)<sub>2</sub>]NO<sub>3</sub> (**2a**), [Ag(H2Ac $\rho$ ClPh)<sub>2</sub>]NO<sub>3</sub> (**3a**) and [Ag(H2Ac $\rho$ NO<sub>2</sub>Ph)(H<sub>2</sub>O)(NO<sub>3</sub>)] (**4a**).

| Compound                                        | ( <b>1</b> )                                                     | ( <b>2a</b> )                                                    | ( <b>3a</b> )                                                                    | ( <b>4a</b> )                                                    |
|-------------------------------------------------|------------------------------------------------------------------|------------------------------------------------------------------|----------------------------------------------------------------------------------|------------------------------------------------------------------|
| Empirical formula                               | C <sub>14</sub> H <sub>13</sub> N <sub>4</sub> O <sub>4</sub> Ag | C <sub>30</sub> H <sub>30</sub> N <sub>7</sub> O <sub>5</sub> Ag | C <sub>28</sub> H <sub>24</sub> Cl <sub>2</sub> N <sub>7</sub> O <sub>5</sub> Ag | C <sub>14</sub> H <sub>14</sub> N <sub>5</sub> O <sub>7</sub> Ag |
| Molecular weight (g mol <sup>-1</sup> )         | 409.15                                                           | 676.48                                                           | 717.31                                                                           | 472.17                                                           |
| T (K)                                           | 270(2)                                                           | 270(2)                                                           | 270(2)                                                                           | 270(2)                                                           |
| Crystal system                                  | monoclinic                                                       | triclinic                                                        | triclinic                                                                        | monoclinic                                                       |
| Space group                                     | P 2 <sub>1</sub> /n                                              | P -1                                                             | P -1                                                                             | P 2 <sub>1</sub> /c                                              |
| Unit cell dimensions                            |                                                                  |                                                                  |                                                                                  |                                                                  |
| a (Å)                                           | 6.7603(7)                                                        | 8.4416(6)                                                        | 8.2925(4)                                                                        | 7.2535(4)                                                        |
| b (Å)                                           | 13.0051(7)                                                       | 12.9864(5)                                                       | 13.1239(7)                                                                       | 13.2543(7)                                                       |
| c (Å)                                           | 16.5751(9)                                                       | 14.7636(6)                                                       | 14.7518(7)                                                                       | 17.9111(8)                                                       |
| $\alpha$ (°)                                    | 90                                                               | 112.115(4)                                                       | 112.238(5)                                                                       | 90                                                               |
| $\beta$ (°)                                     | 97.889(7)                                                        | 99.194(4)                                                        | 98.638(4)                                                                        | 99.214(4)                                                        |
| $\gamma$ (°)                                    | 90                                                               | 95.337(4)                                                        | 96.159(4)                                                                        | 90                                                               |
| V (Å <sup>3</sup> )                             | 1443.46(19)                                                      | 1459.23(14)                                                      | 1445.35(13)                                                                      | 1699.76(15)                                                      |
| Z                                               | 4                                                                | 2                                                                | 2                                                                                | 4                                                                |
| Density calculated (Mg m <sup>-3</sup> )        | 1.883                                                            | 1.540                                                            | 1.648                                                                            | 1.845                                                            |
| Absorption coefficient (mm <sup>-1</sup> )      | 1.424                                                            | 0.743                                                            | 0.934                                                                            | 1.237                                                            |
| F(000)                                          | 816                                                              | 692                                                              | 724                                                                              | 944                                                              |
| Crystal size (mm)                               | 0.21 x 0.06 x 0.06                                               | 0.39 x 0.19 x 0.08                                               | 0.43 x 0.13 x 0.05                                                               | 0.36 x 0.09 x 0.07                                               |
| $\theta$ °range for data collection             | 2.0 to 26.4                                                      | 2.5 to 26.4                                                      | 2.5 to 26.4                                                                      | 1.9 to 29.5                                                      |
| Index ranges                                    | -8 ≤ h ≤ 8<br>-16 ≤ k ≤ 15<br>-20 ≤ l ≤ 20                       | -10 ≤ h ≤ 9<br>-16 ≤ k ≤ 16<br>-18 ≤ l ≤ 18                      | -10 ≤ h ≤ 10<br>-16 ≤ k ≤ 16<br>-18 ≤ l ≤ 18                                     | -10 ≤ h ≤ 9<br>-18 ≤ k ≤ 15<br>-24 ≤ l ≤ 24                      |
| Reflections collected                           | 12186                                                            | 12718                                                            | 22505                                                                            | 13375                                                            |
| Independent reflections (R <sub>int</sub> )     | 2968 (0.0762)                                                    | 5972 (0.0283)                                                    | 5925 (0.0521)                                                                    | 4195 (0.0325)                                                    |
| Completeness to $\theta = 25.242$ (%)           | 100                                                              | 99.9                                                             | 99.9                                                                             | 100                                                              |
| Data/restraints/parameters                      | 2968/0/209                                                       | 5972/12/420                                                      | 5925/12/388                                                                      | 4195/3/ 251                                                      |
| Goodness-of-fit on $F^2$                        | 1.079                                                            | 1.032                                                            | 1.037                                                                            | 1.023                                                            |
| Final R indices [I > 2 $\sigma$ (I)]            | R <sub>1</sub> = 0.0625,<br>wR <sub>2</sub> = 0.1508             | R <sub>1</sub> = 0.0293,<br>wR <sub>2</sub> = 0.0655             | R <sub>1</sub> = 0.0452,<br>wR <sub>2</sub> = 0.1024                             | R <sub>1</sub> = 0.0623,<br>wR <sub>2</sub> = 0.1419             |
| R indices (all data)                            | R <sub>1</sub> = 0.1019<br>wR <sub>2</sub> = 0.1764              | R <sub>1</sub> = 0.0409,<br>wR <sub>2</sub> = 0.0708             | R <sub>1</sub> = 0.0735,<br>wR <sub>2</sub> = 0.1204                             | R <sub>1</sub> = 0.0932,<br>wR <sub>2</sub> = 0.1617             |
| Largest diff. peak and hole (eÅ <sup>-3</sup> ) | 1.562 and -0.668                                                 | 0.276 and -0.441                                                 | 1.149 and -0.796                                                                 | 2.549 and -0.894                                                 |

**Table S2** Selected bond lengths (Å) for [Ag(H2AcPh)NO<sub>3</sub>] (**1**), [Ag(H2AcpCH<sub>3</sub>Ph)<sub>2</sub>]NO<sub>3</sub> (**2a**), [Ag(H2AcpClPh)<sub>2</sub>]NO<sub>3</sub> (**3a**) and [Ag(H2AcpNO<sub>2</sub>Ph)(H<sub>2</sub>O)(NO<sub>3</sub>)] (**4a**) along with data for H2AcPh and H2AcpClPh.

| Atoms   | H2AcPh <sup>40</sup> | ( <b>1</b> ) | ( <b>2a</b> ) | H2AcpClPh <sup>13</sup> | ( <b>3a</b> ) | ( <b>4a</b> ) |
|---------|----------------------|--------------|---------------|-------------------------|---------------|---------------|
| N1-C2   | 1.325(3)             | 1.350(8)     | 1.344(3)      | 1.3345(19)              | 1.343(5)      | 1.342(6)      |
| C2-C7   | 1.487(2)             | 1.494(8)     | 1.492(3)      | 1.4900(18)              | 1.496(6)      | 1.491(7)      |
| C7-N2   | 1.264(3)             | 1.280(7)     | 1.282(3)      | 1.2860(18)              | 1.279(5)      | 1.278(6)      |
| N2-N3   | 1.375(2)             | 1.369(7)     | 1.377(2)      | 1.3810(15)              | 1.380(4)      | 1.369(6)      |
| N3-C8   | 1.347(3)             | 1.365(8)     | 1.367(3)      | 1.3590(17)              | 1.364(5)      | 1.359(6)      |
| C8-O1   | 1.219(2)             | 1.219(7)     | 1.219(3)      | 1.2260(16)              | 1.219(4)      | 1.217(6)      |
| Ag1-N1  | –                    | 2.338(5)     | 2.3709(19)    | –                       | 2.372(3)      | 2.378(4)      |
| Ag1-N2  | –                    | 2.378(5)     | 2.3930(16)    | –                       | 2.401(3)      | 2.372(4)      |
| Ag1-O1  | –                    | 2.564(4)     | 2.5923(16)    | –                       | 2.619(3)      | 2.629(4)      |
| Ag1-O2  | –                    | 2.384(6)     | –             | –                       | –             | 2.488(5)      |
| Ag1-O3  | –                    | 2.692(6)     | –             | –                       | –             | 2.665(4)      |
| Ag1-N4  | –                    | –            | 2.3631(17)    | –                       | 2.371(3)      | –             |
| Ag1-N5  | –                    | –            | 2.3565(17)    | –                       | 2.376(3)      | –             |
| Ag1-O1W | –                    | –            | –             | –                       | –             | 2.359 (4)     |

**Table S3** Selected angles (°) for [Ag(H2AcPh)NO<sub>3</sub>] (**1**), [Ag(H2AcpCH<sub>3</sub>Ph)<sub>2</sub>]NO<sub>3</sub> (**2a**), [Ag(H2AcpClPh)<sub>2</sub>]NO<sub>3</sub> (**3a**) and [Ag(H2AcpNO<sub>2</sub>Ph)(H<sub>2</sub>O)(NO<sub>3</sub>)] (**4a**) along with data for H2AcPh and H2AcpClPh.

| Atoms     | H2AcPh <sup>40</sup> | ( <b>1</b> ) | ( <b>2a</b> ) | H2AcpClPh <sup>13</sup> | ( <b>3a</b> ) | ( <b>4a</b> ) |
|-----------|----------------------|--------------|---------------|-------------------------|---------------|---------------|
| N1-C2-C7  | 116.2(1)             | 117.2(5)     | 117.14(19)    | 116.40(12)              | 117.2(3)      | 116.8(4)      |
| C2-C7-N2  | 114.5(1)             | 114.2(5)     | 115.23(19)    | 115.12(12)              | 115.4(3)      | 115.8(4)      |
| C7-N2-N3  | 119.0(1)             | 120.0(5)     | 118.86(18)    | 116.22(11)              | 118.6(3)      | 119.5(4)      |
| N2-N3-C8  | 117.0(1)             | 118.1(5)     | 117.51(16)    | 117.89(11)              | 117.7(3)      | 118.0(4)      |
| N3-C8-O1  | 123.3(2)             | 122.3(5)     | 121.82(19)    | 123.28(13)              | 122.2(4)      | 122.8(5)      |
| N1-Ag1-N2 | –                    | 68.18(17)    | 68.26(6)      | –                       | 68.25(11)     | 68.52(13)     |
| N1-Ag1-O2 | –                    | 118.35(19)   | –             | –                       | –             | 116.77(14)    |
| N2-Ag1-O2 | –                    | 118.97(18)   | –             | –                       | –             | 120.45(13)    |
| N1-Ag1-O1 | –                    | 133.45(16)   | 132.39(6)     | –                       | 132.01(10)    | 132.60(13)    |
| N2-Ag1-O1 | –                    | 65.27(15)    | 64.15(5)      | –                       | 63.82(10)     | 64.23(12)     |
| O2-Ag1-O1 | –                    | 85.17(15)    | –             | –                       | –             | 90.81(15)     |
| N1-Ag1-O3 | –                    | 92.69(18)    | –             | –                       | –             | 93.85(14)     |
| N2-Ag1-O3 | –                    | 150.62(18)   | –             | –                       | –             | 152.95(14)    |
| O2-Ag1-O3 | –                    | 49.84(16)    | –             | –                       | –             | 48.33(13)     |
| O1-Ag1-O3 | –                    | 129.51(16)   | –             | –                       | –             | 131.23(14)    |
| N4-Ag1-N5 | –                    | –            | 68.82(6)      | –                       | 68.71(10)     | –             |
| N5-Ag1-O1 | –                    | –            | 115.74(6)     | –                       | 118.86(10)    | –             |
| N1-Ag1-N5 | –                    | –            | 106.96(6)     | –                       | 106.56(11)    | –             |

**Table S4** Hydrogen-bond geometry (Å, °) for (1-4a).

| Compound | D—H···A                    | D-H     | H···A   | D···A     | D—H···A |
|----------|----------------------------|---------|---------|-----------|---------|
| (1)      | N3-H3N···O2 <sup>i</sup>   | 0.86    | 2.23    | 2.996(7)  | 149     |
| (2a)     | N3-H3N···O4A <sup>ii</sup> | 0.86    | 2.22    | 3.051(10) | 164     |
| (2a)     | N3-H3N···O4B <sup>ii</sup> | 0.86    | 2.52    | 3.374(17) | 173     |
| (2a)     | N6-H6N···O2A               | 0.86    | 2.33    | 2.974(12) | 132     |
| (2a)     | N6-H6N···O2B               | 0.86    | 2.21    | 2.905(13) | 138     |
| (3a)     | N3-H3N···O4A <sup>ii</sup> | 0.86    | 2.23    | 3.079(7)  | 169     |
| (3a)     | N3-H3N···O4B <sup>ii</sup> | 0.86    | 2.30    | 3.109(8)  | 156     |
| (3a)     | N6-H6N···O2A               | 0.86    | 2.33    | 2.987(7)  | 134     |
| (3a)     | N6-H6N···O2B               | 0.86    | 2.34    | 3.071(9)  | 142     |
| (4a)     | N3-H3N···O2 <sup>iii</sup> | 0.86    | 2.33    | 3.124(6)  | 154     |
| (4a)     | O1W-H1W···O4 <sup>vi</sup> | 0.82(1) | 2.01(4) | 2.770(6)  | 154(8)  |
| (4a)     | O1W-H2W···O5 <sup>v</sup>  | 0.82(1) | 2.50(7) | 3.122(7)  | 134(8)  |
| (4a)     | O1W-H2W···O6 <sup>v</sup>  | 0.82(1) | 2.51(3) | 3.305(7)  | 164(8)  |

Symmetry codes: i = -x+1,-y+2,-z; ii = x,y+1,z; iii = -x+1,-y+1,-z; iv = x+1,y,z; v = x,y-1,z.

*Structure Activity Relationship (SAR) studies*

**Table S5** Stereo-electronic parameters for 2-acetylpyridine-derived hydrazones and their silver(I) complexes (**1-4**).

| Compound                                      |              | $E_{\text{HOMO}}$ (eV) | $E_{\text{LUMO}}$ (eV) | $\Delta E$ (eV) | $\mu$ (D) | S.A ( $\text{\AA}^2$ ) | V ( $\text{\AA}^3$ ) | logP |
|-----------------------------------------------|--------------|------------------------|------------------------|-----------------|-----------|------------------------|----------------------|------|
| H2AcPh                                        | ( <i>E</i> ) | -6.332                 | -1.767                 | 4.565           | 4.675     | 343.76                 | 222.34               | 1.98 |
| H2AcpCH <sub>3</sub> Ph                       | ( <i>E</i> ) | -6.283                 | -1.763                 | 4.520           | 9.332     | 375.47                 | 239.27               | 2.49 |
| H2AcpClPh                                     | ( <i>E</i> ) | -6.300                 | -1.887                 | 4.413           | 4.139     | 359.64                 | 236.23               | 2.58 |
| H2AcpNO <sub>2</sub> Ph                       | ( <i>E</i> ) | -6.394                 | -2.871                 | 3.523           | 6.243     | 384.56                 | 245.6                | 1.92 |
| H2AcPh                                        | ( <i>Z</i> ) | -6.319                 | -1.920                 | 4.399           | 9.970     | 342.03                 | 222.52               | 1.98 |
| H2AcpCH <sub>3</sub> Ph                       | ( <i>Z</i> ) | -6.277                 | -1.899                 | 4.378           | 10.108    | 374.83                 | 239.38               | 2.49 |
| H2AcpClPh                                     | ( <i>Z</i> ) | -6.350                 | -1.934                 | 4.416           | 10.064    | 359.36                 | 236.36               | 2.58 |
| H2AcpNO <sub>2</sub> Ph                       | ( <i>Z</i> ) | -6.443                 | -2.828                 | 3.615           | 11.325    | 383.97                 | 245.71               | 1.92 |
| [Ag(H2AcPh)NO <sub>3</sub> ]                  | ( <b>1</b> ) | -6.894                 | -2.520                 | 4.374           | 7.440     | 336.52                 | 239.79               | 2.80 |
| [Ag(H2AcpCH <sub>3</sub> Ph)NO <sub>3</sub> ] | ( <b>2</b> ) | -6.812                 | -2.471                 | 4.341           | 7.567     | 369.91                 | 256.68               | 3.27 |
| [Ag(H2AcpClPh)NO <sub>3</sub> ]               | ( <b>3</b> ) | -6.842                 | -2.540                 | 4.302           | 11.170    | 354.07                 | 253.73               | 3.32 |
| [Ag(H2AcpNO <sub>2</sub> Ph)NO <sub>3</sub> ] | ( <b>4</b> ) | -7.007                 | -3.106                 | 3.902           | 15.896    | 378.38                 | 263.12               | 2.76 |



**Table S6** Correlation Matrix between the IC<sub>50</sub> data for *Aspergillus flavus* and the Stereo-Electronic parameters of the free-ligands H2AcPh, H2AcpCH<sub>3</sub>Ph and H2AcpNO<sub>2</sub>Ph (*Z* and *E* isomers).

|                         |        | IC <sub>50</sub>          |                        |                        |         |        |                       |                     |      |
|-------------------------|--------|---------------------------|------------------------|------------------------|---------|--------|-----------------------|---------------------|------|
| Compounds               | Isomer | <i>Aspergillus flavus</i> | E <sub>HOMO</sub> (eV) | E <sub>LUMO</sub> (eV) | ΔE (eV) | μ (D)  | S.A (Å <sup>2</sup> ) | V (Å <sup>3</sup> ) | LogP |
| H2AcPh                  | Z      | 48.6                      | -6.319                 | -1.920                 | 4.399   | 9.970  | 342.03                | 222.52              | 1.98 |
| H2AcpCH <sub>3</sub> Ph | Z      | 23.6                      | -6.277                 | -1.899                 | 4.378   | 10.108 | 374.83                | 239.38              | 2.49 |
| H2AcpNO <sub>2</sub> Ph | Z      | 42.1                      | -6.443                 | -2.828                 | 3.615   | 11.325 | 383.97                | 245.71              | 1.92 |
| H2AcPh                  | E      | 48.6                      | -6.332                 | -1.767                 | 4.565   | 4.675  | 343.76                | 222.34              | 1.98 |
| H2AcpCH <sub>3</sub> Ph | E      | 23.6                      | -6.283                 | -1.763                 | 4.520   | 9.332  | 375.47                | 239.27              | 2.49 |
| H2AcpNO <sub>2</sub> Ph | E      | 42.1                      | -6.394                 | -2.871                 | 3.523   | 6.243  | 384.56                | 245.6               | 1.92 |

|                           |                           | Correlation matrix     |                        |          |         |                       |                     |      |  |
|---------------------------|---------------------------|------------------------|------------------------|----------|---------|-----------------------|---------------------|------|--|
|                           | <i>Aspergillus flavus</i> | E <sub>HOMO</sub> (eV) | E <sub>LUMO</sub> (eV) | ΔE (eV)  | μ (D)   | S.A (Å <sup>2</sup> ) | V (Å <sup>3</sup> ) | LogP |  |
| <i>Aspergillus flavus</i> | 1                         |                        |                        |          |         |                       |                     |      |  |
| E <sub>HOMO</sub> (eV)    | -0.54497                  | 1                      |                        |          |         |                       |                     |      |  |
| E <sub>LUMO</sub> (eV)    | -0.27508                  | 0.89878                | 1                      |          |         |                       |                     |      |  |
| ΔE (eV)                   | -0.23329                  | 0.87047                | 0.99815                | 1        |         |                       |                     |      |  |
| μ (D)                     | -0.38759                  | -0.02417               | -0.09964               | -0.10853 | 1       |                       |                     |      |  |
| S.A (Å <sup>2</sup> )     | -0.53567                  | -0.38345               | -0.65381               | -0.68091 | 0.31922 | 1                     |                     |      |  |
| V (Å <sup>3</sup> )       | -0.48824                  | -0.43295               | -0.69820               | -0.72389 | 0.33659 | 0.99773               | 1                   |      |  |
| LogP                      | -0.93965                  | 0.78600                | 0.58460                | 0.54739  | 0.30870 | 0.21464               | 0.16021             | 1    |  |

**Table S7** Correlation Matrix between the IC<sub>50</sub> data obtained for *Penicillium citrinum* and the Stereo-Electronic parameters of the free-ligands H2AcPh, H2AcpCH<sub>3</sub>Ph, H2AcpClPh and H2AcpNO<sub>2</sub>Ph (*Z* and *E* isomers)

|                         |        | IC <sub>50</sub>            |                        |                        |         |        |                       |                     |      |
|-------------------------|--------|-----------------------------|------------------------|------------------------|---------|--------|-----------------------|---------------------|------|
| Compounds               | Isomer | <i>Penicillium citrinum</i> | E <sub>HOMO</sub> (eV) | E <sub>LUMO</sub> (eV) | ΔE (eV) | μ (D)  | S.A (Å <sup>2</sup> ) | V (Å <sup>3</sup> ) | LogP |
| H2AcPh                  | Z      | 72.5                        | -6.319                 | -1.920                 | 4.399   | 9.970  | 342.03                | 222.52              | 1.98 |
| H2AcpCH <sub>3</sub> Ph | Z      | 33.4                        | -6.277                 | -1.899                 | 4.378   | 10.108 | 374.83                | 239.38              | 2.49 |
| H2AcpClPh               | Z      | 44.1                        | -6.350                 | -1.934                 | 4.416   | 10.064 | 359.36                | 236.36              | 2.58 |
| H2AcpNO <sub>2</sub> Ph | Z      | 53.9                        | -6.443                 | -2.828                 | 3.615   | 11.325 | 383.97                | 245.71              | 1.92 |
| H2AcPh                  | E      | 72.5                        | -6.332                 | -1.767                 | 4.565   | 4.675  | 343.76                | 222.34              | 1.98 |
| H2AcpCH <sub>3</sub> Ph | E      | 33.4                        | -6.283                 | -1.763                 | 4.520   | 9.332  | 375.47                | 239.27              | 2.49 |
| H2AcpClPh               | E      | 44.1                        | -6.300                 | -1.887                 | 4.413   | 4.139  | 359.64                | 236.23              | 2.58 |
| H2AcpNO <sub>2</sub> Ph | E      | 53.9                        | -6.394                 | -2.871                 | 3.523   | 6.243  | 384.56                | 245.6               | 1.92 |

|                             |                             | Correlation matrix     |                        |          |         |                       |                     |      |  |
|-----------------------------|-----------------------------|------------------------|------------------------|----------|---------|-----------------------|---------------------|------|--|
|                             | <i>Penicillium citrinum</i> | E <sub>HOMO</sub> (eV) | E <sub>LUMO</sub> (eV) | ΔE (eV)  | μ (D)   | S.A (Å <sup>2</sup> ) | V (Å <sup>3</sup> ) | LogP |  |
| <i>Penicillium citrinum</i> | 1                           |                        |                        |          |         |                       |                     |      |  |
| E <sub>HOMO</sub> (eV)      | -0.34849                    | 1                      |                        |          |         |                       |                     |      |  |
| E <sub>LUMO</sub> (eV)      | -0.10861                    | 0.87592                | 1                      |          |         |                       |                     |      |  |
| ΔE (eV)                     | -0.07333                    | 0.84179                | 0.99777                | 1        |         |                       |                     |      |  |
| μ (D)                       | -0.24292                    | -0.18460               | -0.15718               | -0.15034 | 1       |                       |                     |      |  |
| S.A (Å <sup>2</sup> )       | -0.61756                    | -0.38830               | -0.67268               | -0.69896 | 0.29597 | 1                     |                     |      |  |
| V (Å <sup>3</sup> )         | -0.66355                    | -0.41449               | -0.66623               | -0.68813 | 0.25913 | 0.96790               | 1                   |      |  |
| LogP                        | -0.78128                    | 0.65584                | 0.59805                | 0.57847  | 0.01541 | 0.01320               | 0.13680             | 1    |  |

**Table S8** Correlation Matrix between the IC<sub>50</sub> data for *Aspergillus flavus* and the Stereo-Electronic parameters of complexes (1-4)

| IC <sub>50</sub>                                  |                           |                        |                        |         |        |                       |                     |      | Correlation matrix        |                        |                        |          |          |                       |                     |         |   |
|---------------------------------------------------|---------------------------|------------------------|------------------------|---------|--------|-----------------------|---------------------|------|---------------------------|------------------------|------------------------|----------|----------|-----------------------|---------------------|---------|---|
| Compounds                                         | <i>Aspergillus flavus</i> | E <sub>HOMO</sub> (eV) | E <sub>LUMO</sub> (eV) | ΔE (eV) | μ (D)  | S.A (Å <sup>2</sup> ) | V (Å <sup>3</sup> ) | LogP | <i>Aspergillus flavus</i> | E <sub>HOMO</sub> (eV) | E <sub>LUMO</sub> (eV) | ΔE (eV)  | μ (D)    | S.A (Å <sup>2</sup> ) | V (Å <sup>3</sup> ) | LogP    |   |
| [Ag(H2AcPh)NO <sub>3</sub> ] (1)                  | 12.4                      | -6.894                 | -2.520                 | 4.374   | 7.440  | 336.52                | 239.79              | 2.80 | <i>Aspergillus flavus</i> | 1                      |                        |          |          |                       |                     |         |   |
| [Ag(H2AcpCH <sub>3</sub> Ph)NO <sub>3</sub> ] (2) | 10.5                      | -6.812                 | -2.471                 | 4.341   | 7.567  | 369.91                | 256.68              | 3.27 | E <sub>HOMO</sub> (eV)    | -0.30915               |                        | 1        |          |                       |                     |         |   |
| [Ag(H2AcpClPh)NO <sub>3</sub> ] (3)               | 41.4                      | -6.842                 | -2.540                 | 4.302   | 11.170 | 354.07                | 253.73              | 3.32 | E <sub>LUMO</sub> (eV)    | -0.44226               | 0.93629                |          | 1        |                       |                     |         |   |
| [Ag(H2AcpNO <sub>2</sub> Ph)NO <sub>3</sub> ] (4) | 32.9                      | -7.007                 | -3.106                 | 3.902   | 15.896 | 378.38                | 263.12              | 2.76 | ΔE (eV)                   | -0.47910               | 0.87953                | 0.99063  |          | 1                     |                     |         |   |
|                                                   |                           |                        |                        |         |        |                       |                     |      | μ (D)                     | 0.73959                | -0.79621               | -0.92604 | -0.94497 |                       | 1                   |         |   |
|                                                   |                           |                        |                        |         |        |                       |                     |      | S.A (Å <sup>2</sup> )     | 0.23590                | -0.32975               | -0.62292 | -0.71562 | 0.62611               |                     | 1       |   |
|                                                   |                           |                        |                        |         |        |                       |                     |      | V (Å <sup>3</sup> )       | 0.45714                | -0.32005               | -0.63168 | -0.73130 | 0.72076               | 0.97010             |         | 1 |
|                                                   |                           |                        |                        |         |        |                       |                     |      | LogP                      | 0.15092                | 0.84746                | 0.62831  | 0.52156  | -0.35444              | 0.06685             | 0.15783 | 1 |

**Table S9** Correlation Matrix between the IC<sub>50</sub> data for *Penicillium citrinum* and the Stereo-Electronic parameters of complexes (1), (2) and (4)

| IC <sub>50</sub>                                  |                             |                        |                        |         |        |                       |                     |      | Correlation matrix          |                        |                        |          |          |                       |                     |         |   |
|---------------------------------------------------|-----------------------------|------------------------|------------------------|---------|--------|-----------------------|---------------------|------|-----------------------------|------------------------|------------------------|----------|----------|-----------------------|---------------------|---------|---|
| Compounds                                         | <i>Penicillium citrinum</i> | E <sub>HOMO</sub> (eV) | E <sub>LUMO</sub> (eV) | ΔE (eV) | μ (D)  | S.A (Å <sup>2</sup> ) | V (Å <sup>3</sup> ) | LogP | <i>Penicillium citrinum</i> | E <sub>HOMO</sub> (eV) | E <sub>LUMO</sub> (eV) | ΔE (eV)  | μ (D)    | S.A (Å <sup>2</sup> ) | V (Å <sup>3</sup> ) | LogP    |   |
| [Ag(H2AcPh)NO <sub>3</sub> ] (1)                  | 39.8                        | -6.894                 | -2.520                 | 4.374   | 7.440  | 336.52                | 239.79              | 2.80 | <i>Penicillium citrinum</i> | 1                      |                        |          |          |                       |                     |         |   |
| [Ag(H2AcpCH <sub>3</sub> Ph)NO <sub>3</sub> ] (2) | 17.1                        | -6.812                 | -2.471                 | 4.341   | 7.567  | 369.91                | 256.68              | 3.27 | E <sub>HOMO</sub> (eV)      | -0.55528               |                        | 1        |          |                       |                     |         |   |
| [Ag(H2AcpNO <sub>2</sub> Ph)NO <sub>3</sub> ] (4) | 31.6                        | -7.007                 | -3.106                 | 3.902   | 15.896 | 378.38                | 263.12              | 2.76 | E <sub>LUMO</sub> (eV)      | -0.22645               | 0.93580                |          | 1        |                       |                     |         |   |
|                                                   |                             |                        |                        |         |        |                       |                     |      | ΔE (eV)                     | -0.09691               | 0.88156                | 0.99138  |          | 1                     |                     |         |   |
|                                                   |                             |                        |                        |         |        |                       |                     |      | μ (D)                       | 0.14531                | -0.90352               | -0.99659 | -0.99881 |                       | 1                   |         |   |
|                                                   |                             |                        |                        |         |        |                       |                     |      | S.A (Å <sup>2</sup> )       | -0.64098               | -0.28243               | -0.60247 | -0.70183 | 0.66627               |                     | 1       |   |
|                                                   |                             |                        |                        |         |        |                       |                     |      | V (Å <sup>3</sup> )         | -0.57923               | -0.35631               | -0.66283 | -0.75520 | 0.72235               | 0.99696             |         | 1 |
|                                                   |                             |                        |                        |         |        |                       |                     |      | LogP                        | -0.90675               | 0.85419                | 0.61605  | 0.50757  | -0.54896              | 0.25754             | 0.18147 | 1 |

**Table S10** Correlation Matrix between the IC<sub>50</sub> data for *Candida dubliniensis* and the Stereo-Electronic parameters of complexes (1-4)

| Compounds                                         | IC <sub>50</sub>            |                        |                        |         |        |                       |                     |      |
|---------------------------------------------------|-----------------------------|------------------------|------------------------|---------|--------|-----------------------|---------------------|------|
|                                                   | <i>Candida dubliniensis</i> | E <sub>HOMO</sub> (eV) | E <sub>LUMO</sub> (eV) | ΔE (eV) | μ (D)  | S.A (Å <sup>2</sup> ) | V (Å <sup>3</sup> ) | LogP |
| [Ag(H2AcPh)NO <sub>3</sub> ] (1)                  | 40.7                        | -6.893                 | -2.519                 | 4.373   | 7.440  | 336.52                | 239.79              | 2.80 |
| [Ag(H2AcpCH <sub>3</sub> Ph)NO <sub>3</sub> ] (2) | 44.3                        | -6.811                 | -2.470                 | 4.341   | 7.566  | 369.91                | 256.68              | 3.27 |
| [Ag(H2AcpClPh)NO <sub>3</sub> ] (3)               | 14.5                        | -6.842                 | -2.540                 | 4.302   | 11.170 | 354.07                | 253.73              | 3.32 |
| [Ag(H2AcpNO <sub>2</sub> Ph)NO <sub>3</sub> ] (4) | 13.9                        | -7.000                 | -3.105                 | 3.901   | 15.896 | 378.38                | 263.12              | 2.76 |

|                             | Correlation matrix          |                        |                        |          |          |                       |                     |      |
|-----------------------------|-----------------------------|------------------------|------------------------|----------|----------|-----------------------|---------------------|------|
|                             | <i>Candida dubliniensis</i> | E <sub>HOMO</sub> (eV) | E <sub>LUMO</sub> (eV) | ΔE (eV)  | μ (D)    | S.A (Å <sup>2</sup> ) | V (Å <sup>3</sup> ) | LogP |
| <i>Candida dubliniensis</i> | 1                           |                        |                        |          |          |                       |                     |      |
| E <sub>HOMO</sub> (eV)      | 0.52858                     | 1                      |                        |          |          |                       |                     |      |
| E <sub>LUMO</sub> (eV)      | 0.64759                     | 0.93715                | 1                      |          |          |                       |                     |      |
| ΔE (eV)                     | 0.67205                     | 0.88115                | 0.99076                | 1        |          |                       |                     |      |
| μ (D)                       | -0.87703                    | -0.79832               | -0.92643               | -0.94503 | 1        |                       |                     |      |
| S.A (Å <sup>2</sup> )       | -0.34712                    | -0.33147               | -0.62277               | -0.71504 | 0.62608  | 1                     |                     |      |
| V (Å <sup>3</sup> )         | -0.53839                    | -0.32244               | -0.63179               | -0.73077 | 0.72073  | 0.97010               | 1                   |      |
| LogP                        | 0.05939                     | 0.84565                | 0.62789                | 0.52208  | -0.35447 | 0.06685               | 0.15783             | 1    |

**Table S11** Correlation Matrix between the IC<sub>50</sub> data for *Candida glabrata* and the Stereo-Electronic parameters of complexes (1-4)

| Compounds                                         | IC <sub>x</sub>         |                        |                        |         |        |                       |                     |      |
|---------------------------------------------------|-------------------------|------------------------|------------------------|---------|--------|-----------------------|---------------------|------|
|                                                   | <i>Candida glabrata</i> | E <sub>HOMO</sub> (eV) | E <sub>LUMO</sub> (eV) | ΔE (eV) | μ (D)  | S.A (Å <sup>2</sup> ) | V (Å <sup>3</sup> ) | LogP |
| [Ag(H2AcPh)NO <sub>3</sub> ] (1)                  | 52.8                    | -6.894                 | -2.520                 | 4.374   | 7.440  | 336.52                | 239.79              | 2.80 |
| [Ag(H2AcpCH <sub>3</sub> Ph)NO <sub>3</sub> ] (2) | 44.3                    | -6.812                 | -2.471                 | 4.341   | 7.567  | 369.91                | 256.68              | 3.27 |
| [Ag(H2AcpClPh)NO <sub>3</sub> ] (3)               | 42.1                    | -6.842                 | -2.540                 | 4.302   | 11.170 | 354.07                | 253.73              | 3.32 |
| [Ag(H2AcpNO <sub>2</sub> Ph)NO <sub>3</sub> ] (4) | 52.6                    | -7.007                 | -3.106                 | 3.902   | 15.896 | 378.38                | 263.12              | 2.76 |

|                         | Correlation matrix      |                        |                        |          |          |                       |                     |      |
|-------------------------|-------------------------|------------------------|------------------------|----------|----------|-----------------------|---------------------|------|
|                         | <i>Candida glabrata</i> | E <sub>HOMO</sub> (eV) | E <sub>LUMO</sub> (eV) | ΔE (eV)  | μ (D)    | S.A (Å <sup>2</sup> ) | V (Å <sup>3</sup> ) | LogP |
| <i>Candida glabrata</i> | 1                       |                        |                        |          |          |                       |                     |      |
| E <sub>HOMO</sub> (eV)  | -0.78690                | 1                      |                        |          |          |                       |                     |      |
| E <sub>LUMO</sub> (eV)  | -0.55795                | 0.93715                | 1                      |          |          |                       |                     |      |
| ΔE (eV)                 | -0.45015                | 0.88115                | 0.99076                | 1        |          |                       |                     |      |
| μ (D)                   | 0.25670                 | -0.79832               | -0.92643               | -0.94503 | 1        |                       |                     |      |
| S.A (Å <sup>2</sup> )   | -0.09711                | -0.33147               | -0.62277               | -0.71504 | 0.62608  | 1                     |                     |      |
| V (Å <sup>3</sup> )     | -0.21152                | -0.32244               | -0.63179               | -0.73077 | 0.72073  | 0.97010               | 1                   |      |
| LogP                    | -0.99321                | 0.84565                | 0.62789                | 0.52208  | -0.35447 | 0.06685               | 0.15783             | 1    |

**Table S12** Correlation Matrix between the IC<sub>50</sub> data for *Candida lusitaniae* and the Stereo-Electronic parameters of complexes (1-4)

| IC <sub>50</sub>                                         |                           |                        |                        |         |        |                       |                     |      | Correlation matrix        |                        |                        |          |          |                       |                     |         |   |
|----------------------------------------------------------|---------------------------|------------------------|------------------------|---------|--------|-----------------------|---------------------|------|---------------------------|------------------------|------------------------|----------|----------|-----------------------|---------------------|---------|---|
| Compounds                                                | <i>Candida lusitaniae</i> | E <sub>HOMO</sub> (eV) | E <sub>LUMO</sub> (eV) | ΔE (eV) | μ (D)  | S.A (Å <sup>2</sup> ) | V (Å <sup>3</sup> ) | LogP | <i>Candida lusitaniae</i> | E <sub>HOMO</sub> (eV) | E <sub>LUMO</sub> (eV) | ΔE (eV)  | μ (D)    | S.A (Å <sup>2</sup> ) | V (Å <sup>3</sup> ) | LogP    |   |
| [Ag(H2AcPh)NO <sub>3</sub> ] (1)                         | 29.1                      | -6.894                 | -2.520                 | 4.374   | 7.440  | 336.52                | 239.79              | 2.80 | <i>Candida lusitaniae</i> | 1                      |                        |          |          |                       |                     |         |   |
| [Ag(H2Ac $\rho$ CH <sub>3</sub> Ph)NO <sub>3</sub> ] (2) | 33.7                      | -6.812                 | -2.471                 | 4.341   | 7.567  | 369.91                | 256.68              | 3.27 | E <sub>HOMO</sub> (eV)    | 0.67426                |                        | 1        |          |                       |                     |         |   |
| [Ag(H2Ac $\rho$ ClPh)NO <sub>3</sub> ] (3)               | 20.2                      | -6.842                 | -2.540                 | 4.302   | 11.170 | 354.07                | 253.73              | 3.32 | E <sub>LUMO</sub> (eV)    | 0.73494                | 0.93715                |          | 1        |                       |                     |         |   |
| [Ag(H2Ac $\rho$ NO <sub>2</sub> Ph)NO <sub>3</sub> ] (4) | 17.5                      | -7.007                 | -3.106                 | 3.902   | 15.896 | 378.38                | 263.12              | 2.76 | ΔE (eV)                   | 0.73378                | 0.88115                | 0.99076  |          | 1                     |                     |         |   |
|                                                          |                           |                        |                        |         |        |                       |                     |      | μ (D)                     | -0.90496               | -0.79832               | -0.92643 | -0.94503 |                       | 1                   |         |   |
|                                                          |                           |                        |                        |         |        |                       |                     |      | S.A (Å <sup>2</sup> )     | -0.28474               | -0.33147               | -0.62277 | -0.71504 | 0.62608               |                     | 1       |   |
|                                                          |                           |                        |                        |         |        |                       |                     |      | V (Å <sup>3</sup> )       | -0.45535               | -0.32244               | -0.63179 | -0.73077 | 0.72073               | 0.97010             |         | 1 |
|                                                          |                           |                        |                        |         |        |                       |                     |      | LogP                      | 0.26189                | 0.84565                | 0.62789  | 0.52208  | -0.35447              | 0.06685             | 0.15783 | 1 |

**Table S13** Correlation Matrix between the IC<sub>50</sub> data for *Penicillium citrinum* and the Stereo-Electronic parameters of the ligands H2AcPh, H2AcpCH<sub>3</sub>Ph, H2AcpClPh and H2AcpNO<sub>2</sub>Ph (*Z* and *E* isomers) and complexes (**1-4**)

| IC <sub>50</sub>                                           |        |                             |                        |                        |         |        |                       |                     |      | Correlation matrix          |                             |                        |                        |          |         |                       |                     |      |
|------------------------------------------------------------|--------|-----------------------------|------------------------|------------------------|---------|--------|-----------------------|---------------------|------|-----------------------------|-----------------------------|------------------------|------------------------|----------|---------|-----------------------|---------------------|------|
| Compounds                                                  | Isomer | <i>Penicillium citrinum</i> | E <sub>HOMO</sub> (eV) | E <sub>LUMO</sub> (eV) | ΔE (eV) | μ (D)  | S.A (Å <sup>2</sup> ) | V (Å <sup>3</sup> ) | LogP |                             | <i>Penicillium citrinum</i> | E <sub>HOMO</sub> (eV) | E <sub>LUMO</sub> (eV) | ΔE (eV)  | μ (D)   | S.A (Å <sup>2</sup> ) | V (Å <sup>3</sup> ) | LogP |
| H2AcPh                                                     | Z      | 72.5                        | -6.319                 | -1.920                 | 4.399   | 9.970  | 342.03                | 222.52              | 1.98 | <i>Penicillium citrinum</i> | 1                           |                        |                        |          |         |                       |                     |      |
| H2AcpCH <sub>3</sub> Ph                                    | Z      | 33.4                        | -6.277                 | -1.899                 | 4.378   | 10.108 | 374.83                | 239.38              | 2.49 | E <sub>HOMO</sub> (eV)      | 0.49680                     | 1                      |                        |          |         |                       |                     |      |
| H2AcpClPh                                                  | Z      | 44.1                        | -6.350                 | -1.934                 | 4.416   | 10.064 | 359.36                | 236.36              | 2.58 | E <sub>LUMO</sub> (eV)      | 0.23835                     | 0.70106                | 1                      |          |         |                       |                     |      |
| H2AcpNO <sub>2</sub> Ph                                    | Z      | 53.9                        | -6.443                 | -2.828                 | 3.615   | 11.325 | 383.97                | 245.71              | 1.92 | ΔE (eV)                     | -0.04445                    | 0.21367                | 0.84643                | 1        |         |                       |                     |      |
| H2AcPh                                                     | E      | 72.5                        | -6.332                 | -1.767                 | 4.565   | 4.675  | 343.76                | 222.34              | 1.98 | μ (D)                       | -0.26999                    | -0.40002               | -0.45060               | -0.31859 | 1       |                       |                     |      |
| H2AcpCH <sub>3</sub> Ph                                    | E      | 33.4                        | -6.283                 | -1.763                 | 4.520   | 9.332  | 375.47                | 239.27              | 2.49 | S.A (Å <sup>2</sup> )       | -0.42733                    | 0.01954                | -0.47457               | -0.66473 | 0.38684 | 1                     |                     |      |
| H2AcpClPh                                                  | E      | 44.1                        | -6.300                 | -1.887                 | 4.413   | 4.139  | 359.64                | 236.23              | 2.58 | V (Å <sup>3</sup> )         | -0.76776                    | -0.70576               | -0.76950               | -0.52715 | 0.50840 | 0.66692               | 1                   |      |
| H2AcpNO <sub>2</sub> Ph                                    | E      | 53.9                        | -6.394                 | -2.871                 | 3.523   | 6.243  | 384.56                | 245.6               | 1.92 | LogP                        | -0.86887                    | -0.61535               | -0.07679               | 0.35431  | 0.11992 | -0.02843              | 0.56163             | 1    |
| [Ag(H2AcPh)NO <sub>3</sub> ] ( <b>1</b> )                  |        | 39.8                        | -6.894                 | -2.520                 | 4.374   | 7.440  | 336.52                | 239.79              | 2.80 |                             |                             |                        |                        |          |         |                       |                     |      |
| [Ag(H2AcpCH <sub>3</sub> Ph)NO <sub>3</sub> ] ( <b>2</b> ) |        | 17.1                        | -6.812                 | -2.471                 | 4.341   | 7.567  | 369.91                | 256.68              | 3.27 |                             |                             |                        |                        |          |         |                       |                     |      |
| [Ag(H2AcpNO <sub>2</sub> Ph)NO <sub>3</sub> ] ( <b>4</b> ) |        | 31.6                        | -7.007                 | -3.106                 | 3.902   | 15.896 | 378.38                | 263.12              | 2.76 |                             |                             |                        |                        |          |         |                       |                     |      |

**Table S14** Correlation Matrix between the IC<sub>50</sub> data for *Candida glabrata* and the Stereo-Electronic parameters of the ligands H2AcpClPh and H2AcpNO<sub>2</sub>Ph (*Z* and *E* isomers) and complexes (**1-4**)

| Compounds                                                  | Isomer | IC <sub>50</sub>        |                        |                        |         |        |                       |                     |      | Correlation matrix      |                        |                        |          |          |                       |                     |        |   |
|------------------------------------------------------------|--------|-------------------------|------------------------|------------------------|---------|--------|-----------------------|---------------------|------|-------------------------|------------------------|------------------------|----------|----------|-----------------------|---------------------|--------|---|
|                                                            |        | <i>Candida glabrata</i> | E <sub>HOMO</sub> (eV) | E <sub>LUMO</sub> (eV) | ΔE (eV) | μ (D)  | S.A (Å <sup>2</sup> ) | V (Å <sup>3</sup> ) | LogP | <i>Candida glabrata</i> | E <sub>HOMO</sub> (eV) | E <sub>LUMO</sub> (eV) | ΔE (eV)  | μ (D)    | S.A (Å <sup>2</sup> ) | V (Å <sup>3</sup> ) | LogP   |   |
| H2AcpClPh                                                  | Z      | 102.8                   | -6.350                 | -1.934                 | 4.416   | 10.064 | 359.36                | 236.36              | 2.58 | <i>Candida glabrata</i> | 1                      |                        |          |          |                       |                     |        |   |
| H2AcpNO <sub>2</sub> Ph                                    | Z      | 77.0                    | -6.443                 | -2.828                 | 3.615   | 11.325 | 383.97                | 245.71              | 1.92 | E <sub>HOMO</sub> (eV)  | 0.90610                | 1                      |          |          |                       |                     |        |   |
| H2AcpClPh                                                  | E      | 102.8                   | -6.300                 | -1.887                 | 4.413   | 4.139  | 359.64                | 236.23              | 2.58 | E <sub>LUMO</sub> (eV)  | 0.59964                | 0.52035                | 1        |          |                       |                     |        |   |
| H2AcpNO <sub>2</sub> Ph                                    | E      | 77.0                    | -6.394                 | -2.871                 | 3.523   | 6.243  | 384.56                | 245.6               | 1.92 | ΔE (eV)                 | 0.00290                | -0.16028               | 0.75951  | 1        |                       |                     |        |   |
| [Ag(H2AcPh)NO <sub>3</sub> ] ( <b>1</b> )                  |        | 52.8                    | -6.894                 | -2.520                 | 4.374   | 7.440  | 336.52                | 239.79              | 2.80 | μ (D)                   | -0.38215               | -0.53503               | -0.57311 | -0.25489 | 1                     |                     |        |   |
| [Ag(H2AcpCH <sub>3</sub> Ph)NO <sub>3</sub> ] ( <b>2</b> ) |        | 44.3                    | -6.812                 | -2.471                 | 4.341   | 7.567  | 369.91                | 256.68              | 3.27 | S.A (Å <sup>2</sup> )   | 0.12232                | 0.26304                | -0.53300 | -0.81645 | 0.26905               | 1                   |        |   |
| [Ag(H2AcpClPh)NO <sub>3</sub> ] ( <b>3</b> )               |        | 42.1                    | -6.842                 | -2.540                 | 4.302   | 11.170 | 354.07                | 253.73              | 3.32 | V (Å <sup>3</sup> )     | -0.76774               | -0.73458               | -0.71121 | -0.26251 | 0.64968               | 0.40027             | 1      |   |
| [Ag(H2AcpNO <sub>2</sub> Ph)NO <sub>3</sub> ] ( <b>4</b> ) |        | 52.6                    | -7.007                 | -3.106                 | 3.902   | 15.896 | 378.38                | 263.12              | 2.76 | LogP                    | -0.59212               | -0.65469               | 0.21859  | 0.75137  | 0.12441               | -0.56143            | 0.4026 | 1 |

**Table S15** Correlation Matrix between the IC<sub>50</sub> data for *Candida tropicalis* and the Stereo-Electronic parameters of the ligands H2AcpClPh and H2AcpNO<sub>2</sub>Ph (*Z* and *E* isomers) and complexes (**1-4**)

|                                                            |        | IC <sub>50</sub>          |                        |                        |         |        |                       |                     |      | Correlation matrix        |                        |                        |          |          |                       |                     |        |   |
|------------------------------------------------------------|--------|---------------------------|------------------------|------------------------|---------|--------|-----------------------|---------------------|------|---------------------------|------------------------|------------------------|----------|----------|-----------------------|---------------------|--------|---|
| Compounds                                                  | Isomer | <i>Candida tropicalis</i> | E <sub>HOMO</sub> (eV) | E <sub>LUMO</sub> (eV) | ΔE (eV) | μ (D)  | S.A (Å <sup>2</sup> ) | V (Å <sup>3</sup> ) | LogP | <i>Candida tropicalis</i> | E <sub>HOMO</sub> (eV) | E <sub>LUMO</sub> (eV) | ΔE (eV)  | μ (D)    | S.A (Å <sup>2</sup> ) | V (Å <sup>3</sup> ) | Log P  |   |
| H2AcpClPh                                                  | Z      | 164.1                     | -6.350                 | -1.934                 | 4.416   | 10.064 | 359.36                | 236.36              | 2.58 | <i>Candida tropicalis</i> | 1                      |                        |          |          |                       |                     |        |   |
| H2AcpNO <sub>2</sub> Ph                                    | Z      | 99.0                      | -6.443                 | -2.828                 | 3.615   | 11.325 | 383.97                | 245.71              | 1.92 | E <sub>HOMO</sub> (eV)    | 0.90452                |                        | 1        |          |                       |                     |        |   |
| H2AcpClPh                                                  | E      | 164.1                     | -6.300                 | -1.887                 | 4.413   | 4.139  | 359.64                | 236.23              | 2.58 | E <sub>LUMO</sub> (eV)    | 0.69676                | 0.52035                |          | 1        |                       |                     |        |   |
| H2AcpNO <sub>2</sub> Ph                                    | E      | 99.0                      | -6.394                 | -2.871                 | 3.523   | 6.243  | 384.56                | 245.6               | 1.92 | ΔE (eV)                   | 0.11636                | -0.16028               | 0.75951  |          | 1                     |                     |        |   |
| [Ag(H2AcPh)NO <sub>3</sub> ] ( <b>1</b> )                  |        | 45.2                      | -6.894                 | -2.520                 | 4.374   | 7.440  | 336.52                | 239.79              | 2.80 | μ (D)                     | -0.42414               | -0.53503               | -0.57311 | -0.25489 |                       | 1                   |        |   |
| [Ag(H2AcpCH <sub>3</sub> Ph)NO <sub>3</sub> ] ( <b>2</b> ) |        | 60.7                      | -6.812                 | -2.471                 | 4.341   | 7.567  | 369.91                | 256.68              | 3.27 | S.A (Å <sup>2</sup> )     | 0.11492                | 0.26304                | -0.53300 | -0.81645 | 0.26905               |                     | 1      |   |
| [Ag(H2AcpClPh)NO <sub>3</sub> ] ( <b>3</b> )               |        | 40.5                      | -6.842                 | -2.540                 | 4.302   | 11.170 | 354.07                | 253.73              | 3.32 | V (Å <sup>3</sup> )       | -0.72338               | -0.73458               | -0.71121 | -0.26251 | 0.64968               | 0.4002              | 1      |   |
| [Ag(H2AcpNO <sub>2</sub> Ph)NO <sub>3</sub> ] ( <b>4</b> ) |        | 50.8                      | -7.007                 | -3.106                 | 3.902   | 15.896 | 378.38                | 263.12              | 2.76 | LogP                      | -0.45914               | -0.65469               | 0.21859  | 0.75137  | 0.12441               | -0.5614             | 0.4026 | 1 |
